# Supplementary material
Source: PubMed Central journal article supplement (PMC3975909)

## SUPPLEMENTAL FIGURES

**Figure S1. Differential response of ongoing cellular protein synthesis to HSV-1 vs. HCMV infection.** Normal primary human fibroblasts (NHDFs) were mock-infected or infected with HSV1 or HCMV. At the indicated hours post-infection (HPI), cultures were metabolically labeled with  $^{35}\text{S}$  amino acids for 1h. Total protein was harvested, fractionated by SDS-PAGE, and the fixed dried gel exposed to X-ray film. The migration of molecular weight standards (in Kd) is shown to the left. Note the strong impairment of ongoing host protein synthesis in HSV1-infected cells compared to HCMV-infected cells.

**Figure S2. Validating RNA abundance for select gene targets.** Total RNA was isolated from mock-infected (black bars) vs HCMV-infected (gray bars, MOI=3) cells at 48 hpi (left panel on each graph marked HCMV). Total RNA was also collected from NHDFs that express UL38 from a doxycycline (Dox)-inducible promoter 72 h post-treatment without (black bars) or with (gray bars) dox (right panel on each graph marked UL38). For each of the indicated genes, RNA was analyzed by real-time qPCR and normalized to 18S rRNA levels. The values from the microarray experiment are included for comparison.

**Figure S3. Additional host proteins induced upon UL38 expression in uninfected cells.** Total protein was harvested from NHDFs that express UL38 from a doxycycline (Dox)-inducible promoter 72 h post-treatment with or without dox . Triplicate samples were quantified by immunoblotting using the indicated

primary antibodies and a secondary antibody covalently linked to an infrared fluorophore. The membrane was scanned and the fold-change upon UL38-induction quantified using an Odyssey infrared imager. Each band was measured for raw intensity value and normalized to an actin loading control.

**Figure S4. Target gene depletion selectively impacts HCMV replication, but not HSV-1 or Vaccinia virus replication.** A) NHDFs transfected with a control, non-silencing siRNA (*ctrl*) or individual siRNAs targeting PP1 $\alpha$  (#5, #6) were infected with Vaccinia Virus (VacV) (MOI=0.1). After 24 hpi samples were harvested and analyzed by immunoblotting with the indicated antisera. B) NHDFs were mock-infected or infected (MOI=5) with HSV-1. At the indicated hours post-infection, total protein was collected and analyzed by immunoblotting with the indicated antisera. C) NHDFs transfected with a control, non-silencing siRNA (*ctrl*) or an siRNA targeting eIF6 were infected with HSV-1 (MOI=1). After 12 h cultures were metabolically pulse-labeled for 1 h with [<sup>35</sup>S]Met-Cys. Total protein was harvested, fractionated by SDS-PAGE, and the labeled polypeptides visualized by autoradiography. The migration of molecular weight standards (in Kd) is shown to the left of the panel. D) As in C except after 13 h samples were harvested and analyzed by immunoblotting with the indicated antisera against HSV-1-encoded polypeptides (ICP0, VP16, Us11), eIF6, or actin.

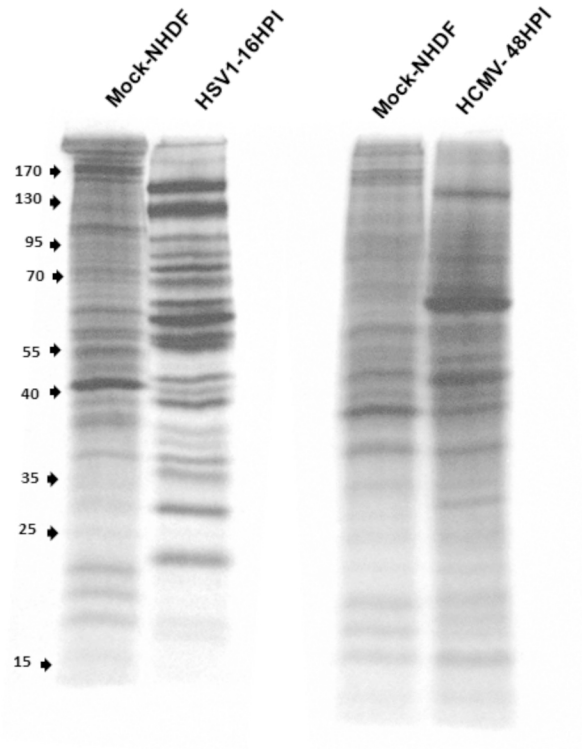

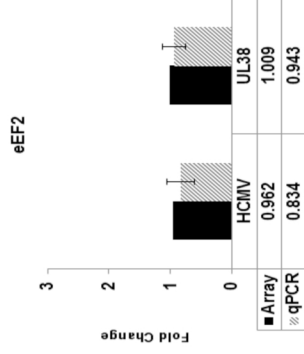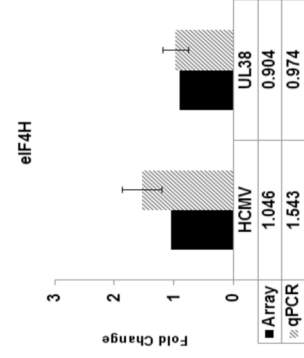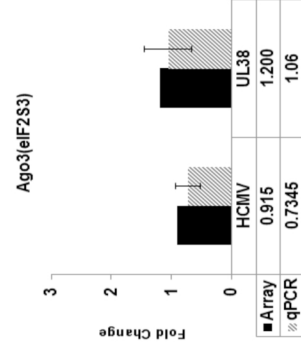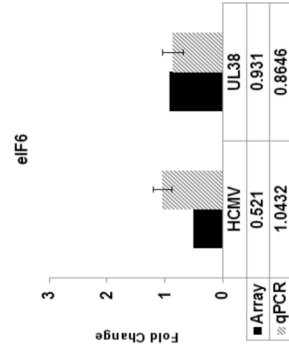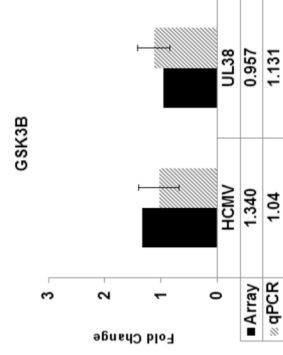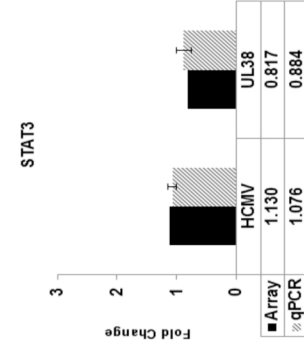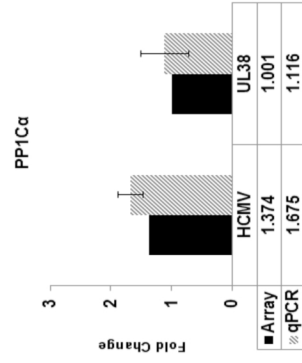

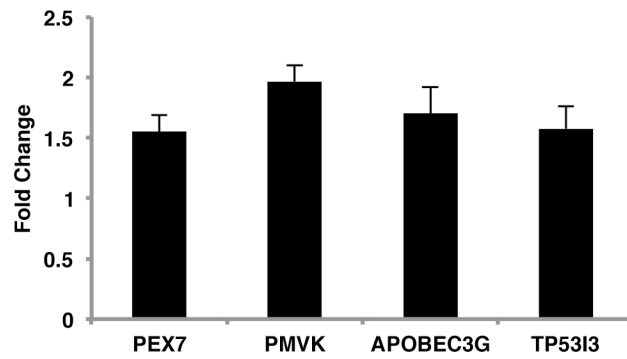

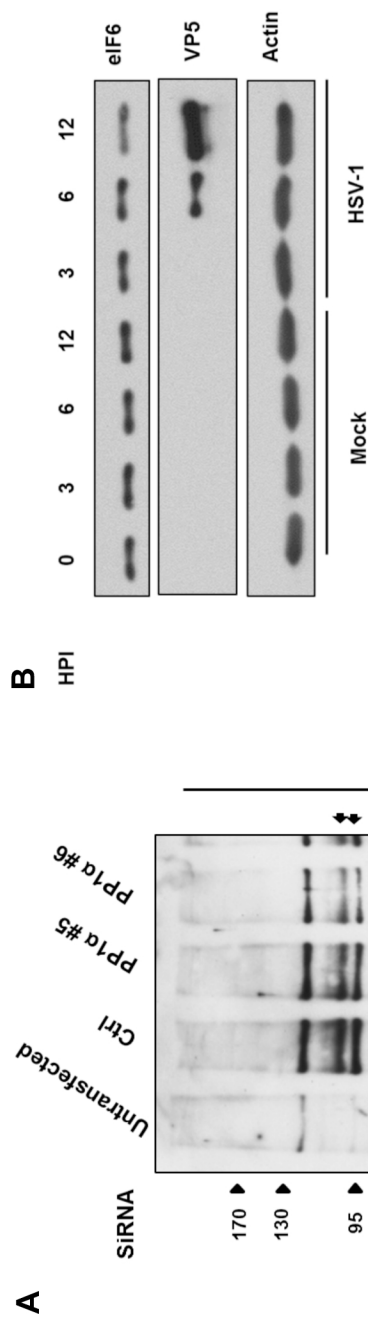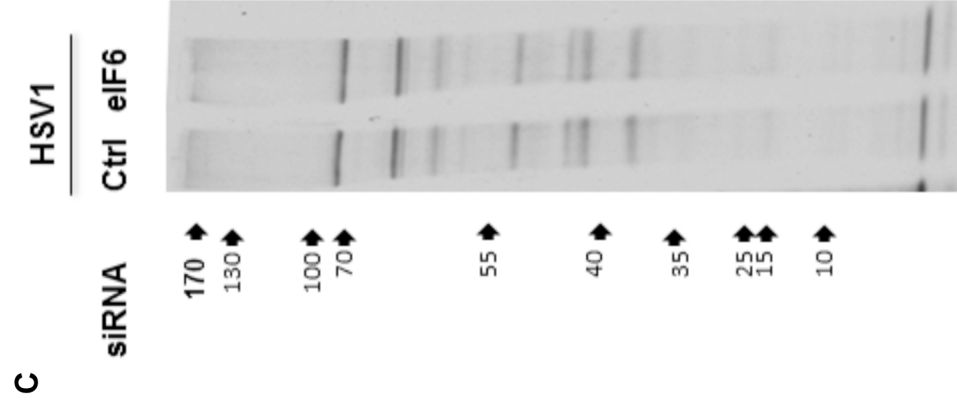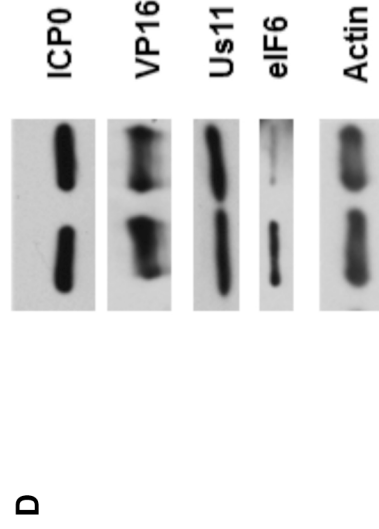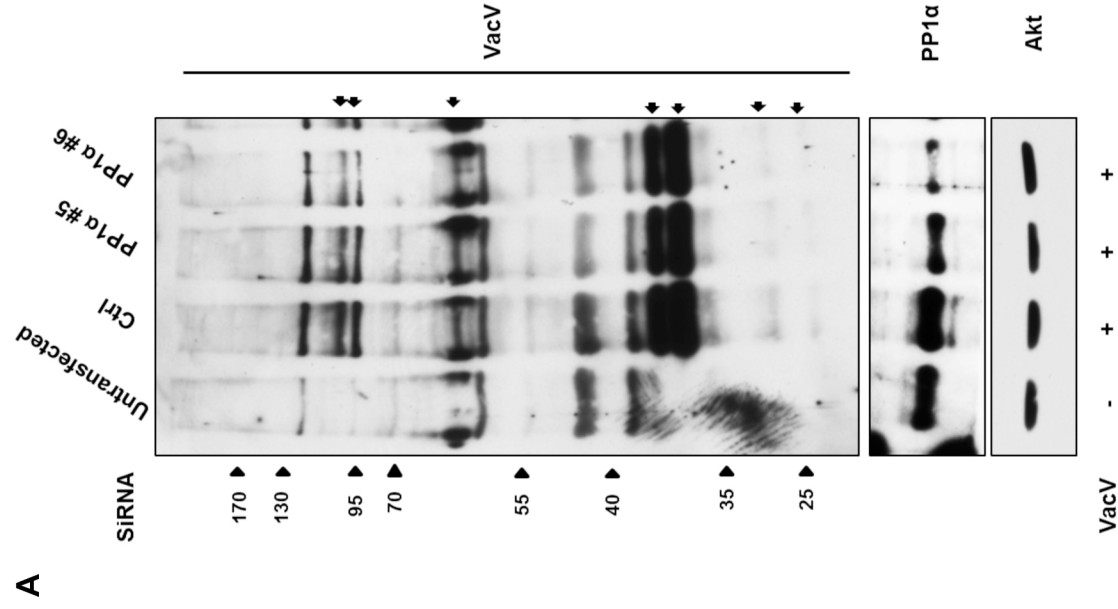

Supplement: NIHMS546998-supplement-01.pdf [file NIHMS546998-supplement-01.pdf]
