# Supplementary material
Source: PubMed Central journal article supplement (PMC3975909)
Supplement: NIHMS546998-supplement-02.pdf [file NIHMS546998-supplement-02.pdf]

## SUPPLEMENTAL TABLES

**Supplemental Table 1. mRNAs whose translation was enriched upon HCMV infection and UL38 expression: DAVID Functional Analysis.**

**Supplemental Table 2. mRNAs whose translation was enriched upon HCMV infection but not UL38 Expression: David Functional Analysis.**

**Supplemental Table 3. mRNAs whose translation was suppressed upon HCMV infection or UL38 Expression: DAVID Functional Analysis.**

**Supplemental Table 4. mRNAs whose translation are enriched during UL38 expression but not HCMV infection.**

**Supplemental Table 5. Subanalysis of *Cell cycle, mitochondrion, apoptosis, RNA processing stress-response* terms from Supplementary Table 1 & Table 2.**

**Supplementary Figure 6. 5' UTR analysis of mRNAs that are translationally regulated during HCMV infection.**

**Supplemental Table 7. TOP motif-bearing mRNAs recruited to polysomes during UL38 stimulation and/or HCMV infection.**

**Supplemental Table 8. DAVID functional analysis of TOP bearing mRNAs in  
Supplementary Table 6.**

**Supplementary Table 9. Overlap in translation signatures with other  
translateome studies.**

Supplemental Table 1: mRNAs whose translation was enriched upon HCMV infection and UL38 expression: DAVID Functional Analysis

| Category | GOTERM_BP_FAT |         | GOTERM_BP_FAT  |        | GOTERM_BP_FAT             |      | GOTERM_BP_FAT |           | Category   | GOTERM_BP_FAT |        |                 |  |
|----------|---------------|---------|----------------|--------|---------------------------|------|---------------|-----------|------------|---------------|--------|-----------------|--|
| Term     | Cell Cycle    |         | RNA Processing |        | Cytoskeleton Organization |      | Translation   |           | Apoptosis  |               | Term   | DNA Replication |  |
| Counts   | 56            |         | 39             |        | 31                        |      | 25            |           | 48         |               | Counts | 15              |  |
| p*       | 1.10E-04      |         | 3.40E-03       |        | 6.20E-03                  |      | 7.40E-03      |           | 1.50E-02   |               | p*     | 3.10E-02        |  |
| Genes    |               |         |                |        |                           |      |               |           |            |               | Genes  |                 |  |
|          | ARL2          | ILK     | ARL6IP4        | RPL35A | ARF6                      | TUBB | HBS1L         | BAK1      | MKL1       |               |        | GINS3           |  |
|          | ARL3          | ILF3    | CD2BP2         | HNRNPL | AGFG1                     |      | DHPS          | BAX       | MAPK1      |               |        | GINS4           |  |
|          | CLIP1         | KPNA2   | EMG1           | RNPS1  | CKS2                      |      | EEF1A1        | BNIP1     | NME1, NME2 |               |        | RAD1            |  |
|          | CDC14A        | KRT18   | FTSJ1          | SNRPD1 | FGFR1OP                   |      | EEF2          | FAF1      | NUDT2      |               |        | RBM14           |  |
|          | CKS2          | KIF22   | ISY1           | SNRPA  | SEH1L                     |      | EIF2S3        | FASTK     | PPIF       |               |        | CDT1            |  |
|          | DMC1          | MAPRE3  | LSM2           | SNUPN  | ABI2                      |      | EIF4E         | PYCARD    | PRDX5      |               |        | CINP            |  |
|          | MAD2L2        | MAPK1   | LSM4           | SIP1   | ALDOA                     |      | EIF5A         | ARHGDI A  | PTENP1     |               |        | CDKN2D          |  |
|          | PDS5B         | NUP43   | LSM6           | TRA2A  | ANK1                      |      | EIF6          | ARHGEF12  | PEA15      |               |        | ING5            |  |
|          | RAD1          | NDE1    | LSM7           |        | BIN3                      |      | MRPL12        | SIVA1     | PHLDA3     |               |        | MCM5            |  |
|          | RASSF4        | PIN1    | PRPF18         |        | CNN3                      |      | MRPL23        | TIAL1     | PML        |               |        | RFC2            |  |
|          | S100A6        | PML     | RBM14          |        | CAPZB                     |      | MRPL4         | B4GALT1   | PRKRA      |               |        | RNASEH2A        |  |
|          | SEH1L         | PSMD9   | RBMS2          |        | CDC42                     |      | MRPL9         | ATF5      | PPP3R1     |               |        | TREX1           |  |
|          | SETD8         | PSME2   | RALY           |        | CETN2                     |      | MRPS10        | ASNS      | RNF7       |               |        | TK1             |  |
|          | UHMK1         | PSMB8   | TARBP2         |        | CFL1                      |      | MRPS16        | BTC       | SOS2       |               |        | TYMS            |  |
|          | AK1           | PPP1CA  | THOC4          |        | CYTH2                     |      | PDF, COG8     | CREB1     | TGFB2      |               |        | TBRG1           |  |
|          | BIN3          | PPP2R3B | U2AF1          |        | DLG1                      |      | RPL21         | CASP2     | TUBB       |               |        |                 |  |
|          | BUB3          | SGOL1   | WDR4           |        | DYNC1H1                   |      | RPL34         | CASP4     | TP53I3     |               |        |                 |  |
|          | CALM1         | RANBP1  | WDR77          |        | INF2                      |      | RPL35A        | CASP6     | YWHAB      |               |        |                 |  |
|          | CETN2         | SUV39H1 | CPSF4          |        | MYH11                     |      | RPL36         | C14orf153 |            |               |        |                 |  |
|          | CDT1          | HAUS7   | DUS2L          |        | NDE1                      |      | RPS2          | CFL1      |            |               |        |                 |  |
|          | CCNB1         | TLK1    | EXOSC3         |        | OBSL1                     |      | RPS23         | CDKN2D    |            |               |        |                 |  |
|          | CCND3         | TBRG1   | HNRNPH1        |        | PAK1                      |      | RPS9          | DAPK3     |            |               |        |                 |  |
|          | CDK10         | TGFB2   | HNRPLL         |        | PFN1                      |      | RPLP1         | DDAH2     |            |               |        |                 |  |
|          | CINP          | TUBB    | POLR2E         |        | PPP4C                     |      | SARS2         | EIF5A     |            |               |        |                 |  |
|          | CDKN2D        | VPS24   | POLR2F         |        | RAC2                      |      | EIF1          | FOXO3/B   |            |               |        |                 |  |
|          | DTYMK         | VASH1   | POLR2L         |        | RAC3                      |      |               | GAS1      |            |               |        |                 |  |
|          | DYNC1H1       |         | PRKRA          |        | RANBP1                    |      |               | HSPB1     |            |               |        |                 |  |
|          | ERH           |         | QTRT1          |        | HAUS7                     |      |               | HDAC6     |            |               |        |                 |  |
|          | GAS1          |         | RRP1           |        | TPM1                      |      |               | ILK       |            |               |        |                 |  |
|          | HMG20B        |         | RRP9           |        | ARPC4                     |      |               | KRT18     |            |               |        |                 |  |

Supplemental Table 1: mRNAs whose translation was enriched upon HCMV infection and UL38 expression: DAVID Functional Analysis

| GOTERM_CC_FAT |           |           | GOTERM_CC_FAT |        | GOTERM_CC_FAT |         |
|---------------|-----------|-----------|---------------|--------|---------------|---------|
| Mitochondrion |           |           | Nucleolus     |        | Nucleoplasm   |         |
| 84            |           |           | 44            |        | 59            |         |
| 1.40E-09      |           |           | 1.90E-03      |        | 5.60E-05      |         |
| ARL2BP        | CREB1     | PTENP1    | EMG1          | PITX1  | CTBP1         | HNRNPH1 |
| ATP5G2        | CLIC4     | PEBP1     | GPSM2         | POLR2F | PDLIM1        | HDAC6   |
| ATP5S         | C14orf153 | PRKACA    | ISY1          | PML    | PHF21A        | HDAC9   |
| ATP5O         | COQ4      | QTRT1     | PRKRIP1       | RRP1   | PRPF18        | ING5    |
| ATP5D         | COQ5      | SHMT2     | RBM14         | RRP9   | RBM14         | KPNA2   |
| BAK1          | COQ7      | SARS2     | RRN3          | RPL36  | RRN3          | MED20   |
| BAX           | CCDC123   | GCSH      | S100A4        | RPS2   | SIVA1         | MED22   |
| HAX1          | CYB5B     | SUCLG2    | SAP30L        | RPS9   | SMAD9         | MTA2    |
| LYRM4         | COX8A     | SLC25A6   | SEN3          | STX17  | SEN3          | MBD1    |
| MRS2          | DGUOK     | SLC25A10  | UBAC1         | STX5   | TBX2          | MBD2    |
| MTERFD3       | DCI       | SLC25A30  | APOBEC3F      | TXN2   | TAF6L         | MCM5    |
| ASAH2B        | FIBP      | SLC25A37  | APOBEC3G      | UBTF   | TAF8          | MAPK1   |
| NDUFA7        | GTF3C2    | SLC25A40  | APTX          | ZNF174 | TEAD2         | POLR2E  |
| NDUFAF3       | GCAT      | SAMM50    | BUB3          | ZNF3   | TINF2         | POLR2F  |
| NDUFB7        | HLCS      | SPG7      | CAMK4         |        | THOC4         | POLR2L  |
| NDUFS6        | HADH      | TXN       | CBX5          |        | U2AF1         | POLR3C  |
| NFS1          | HSD17B8   | TXN2      | EME1          |        | WDR4          | POLR3K  |
| PRELID1       | ILF3      | TIMM10    | EIF6          |        | ATF5          | PML     |
| PARK7         | IVD       | TOMM22    | EXOSC3        |        | APTX          | PRKAB2  |
| SHC1          | MSRB3     | TMLHE     | FGF22         |        | CREB1         | PPP1CA  |
| SIVA1         | MMAB      | PDF, COG8 | HNRNPH1       |        | CAMK4         | RFC2    |
| ACOT7         | MRPL12    | PIIF      | ILF3          |        | CALM1         | RPS2    |
| AP2M1         | MRPL23    | PRDX5     | MRTO4         |        | CASP6         | RFWD2   |
| AK1           | MRPL4     | PEX11B    | MTA2          |        | CDT1          | HNRNPL  |
| AGMAT         | MRPL54    |           | MAPK1         |        | CBX5          | RNPS1   |
| AKR7A2        | MRPL9     |           | MBNL3         |        | CCNB1         | SNRPD1  |
| ANXA10        | MRPS10    |           | NLE1          |        | ERCC8         | SIP1    |
| APOBEC3F      | MRPS16    |           | NFKBIE        |        | GTF3C2        | YWHAB   |
| APOBEC3G      | MAPK10    |           | NIP7          |        | GTF3C3        | UBTF    |
| BPHL          | PANK2     |           | NOL12         |        | GTF3C4        |         |

| Category | GOTERM_CC_FAT   |        | GOTERM_CC_FAT |
|----------|-----------------|--------|---------------|
| Term     | Golgi Apparatus |        | Peroxisome    |
| Counts   | 48              |        | 11            |
| p*       | 1.40E-02        |        | 6.80E-03      |
| Genes    | ARF6            | GOSR2  | ACOX3         |
| ARL2     | LDLRAP1         | AP2M1  |               |
| ARL3     | MGAT2           | GTF3C2 |               |
| AGFG1    | MAP6            | PRDX5  |               |
| GPSM2    | MBNL3           | PEX11B |               |
| GNAS     | NFKBIE          | PEX13  |               |
| RAB34    | PAK1            | PEX7   |               |
| RAB38    | PDF, COG8       | PMVK   |               |
| RAB6A    | PEBP1           | SERHL2 |               |
| RAB7A    | PRKACA          | TRIM37 |               |
| RRAGB    | PHTF1           | XDH    |               |
| SYS1     | SPPL2B          |        |               |
| B4GALT1  | SLC35C1         |        |               |
| B4GALT6  | STX5            |        |               |
| AP1S3    | STX6            |        |               |
| AP3D1    | VTI1B           |        |               |
| AKR7A2   | VAMP5           |        |               |
| ACER3    | ZFPL1           |        |               |
| ARRB1    |                 |        |               |
| B3GALNT2 |                 |        |               |
| CREB3    |                 |        |               |
| CHST3    |                 |        |               |
| C11orf2  |                 |        |               |
| COPA     |                 |        |               |
| COPB2    |                 |        |               |
| COPE     |                 |        |               |
| DYNC1H1  |                 |        |               |
| ENTPD6   |                 |        |               |
| FGF22    |                 |        |               |
| FLOT1    |                 |        |               |

Supplemental Table 2: mRNAs whose translation was enriched upon HCMV infection but not UL38 Expression: David Functional Analysis

| Category | GOTERM_BP_FAT |       | GOTERM_BP_FAT |        |                | GOTERM_BP_FAT |        |  |
|----------|---------------|-------|---------------|--------|----------------|---------------|--------|--|
| Term     | DNA Repair    |       | Cell Cycle    |        |                | Translation   |        |  |
| Counts   | 45            |       | 74            |        |                | 39            |        |  |
| p*       | 6.60E-05      |       | 5.80E-04      |        |                | 3.40E-04      |        |  |
| Genes    | APEX1         | MORF4 | ARL2          | IRF6   | CDK11A, CDK11B | COPS5         | RPL11  |  |
|          | ASF1A         | MLH3  | CDC5L         | MAPRE3 | STAG2          | DPH1          | RPL19  |  |
|          | FBXO6         | MYO6  | FANCI         | MAPK1  | SMC3           | FAU           | RPL35A |  |
|          | FANCI         | NONO  | NIPBL         | MAPK13 | TERF2          | GFM2          | RPS10  |  |
|          | FANCM         | NHEJ1 | RAD21         | MLH3   | TLK1           | PET112L       | RPS19  |  |
|          | KAT5          | PARP2 | RAD51C        | MLL    | TLK2           | C12orf65      | RPLP1  |  |
|          | PRPF19        | PSEN1 | RAD51L1       | NUDC   | TBRG1          | DHPS          | SELT   |  |
|          | RAD21         | RFC1  | RIF1          | PES1   | TBRG4          | EEF1G         | EIF4A1 |  |
|          | RAD51C        | SFPQ  | PRR5          | PSMC1  | TUBB2A         | EIF1AD        | UBB    |  |
|          | RAD51L1       | SMC3  | ARHGEF2       | PSMC2  | TUBB2B         | EIF2B2        | UBC    |  |
|          | RIF1          | SOD1  | SKP1          | PSMC3  | TPD52L1        | EIF3I         |        |  |
|          | REV1          | TERF2 | WEE1          | PSMD1  | UBB            | EIF4G3        |        |  |
|          | RECQL         | TLK1  | BTRC          | PSMD11 | UBC            | EIF4E2        |        |  |
|          | XRCC4         | TLK2  | BIN3          | PSMD12 | UBE2I          | EIF4H         |        |  |
|          | XRCC5         | UIMC1 | BUB1          | PSMD13 | ZNF830         | EIF5A         |        |  |
|          | XRCC6         | UBE2A | CDC123        | PSMD3  | ZC3HC1         | EIF5B         |        |  |
|          | ANKRD17       |       | CUL2          | PSMD4  |                | QRSL1         |        |  |
|          | AATF          |       | CUL3          | PSMD6  |                | HARS          |        |  |
|          | AIFM1         |       | CCNDBP1       | PSMD7  |                | ICT1          |        |  |
|          | CIB1          |       | CDK7          | PSMF1  |                | MRPL22        |        |  |
|          | CASP9         |       | CDKN1B        | PSMA1  |                | MRPL27        |        |  |
|          | C11orf30      |       | DCTN2         | PSMA3  |                | MRPL28        |        |  |
|          | CDK7          |       | GSK3B         | PSMA5  |                | MRPL35        |        |  |
|          | FOXO3/B       |       | GADD45GIP1    | PSMB1  |                | MRPL37        |        |  |
|          | FLJ35220      |       | HHEX          | PSMB4  |                | MRPL43        |        |  |
|          | ING4          |       | RBBP4         | PSMB5  |                | MRPL45        |        |  |
|          | MBD4          |       | ID4           | PPP1CA |                | MRPS18A       |        |  |
|          | MAPK1         |       | ING1          | PPP5C  |                | FARSA         |        |  |
|          | MAPK14        |       | ING4          | PPP6C  |                | RSL1D1        |        |  |

Supplemental Table 2: mRNAs whose translation was enriched upon HCMV infection but not UL38 Expression: David Functional Analysis

| GOTERM_BP_FAT          |        | Category | GOTERM_BP_FAT       |         | GOTERM_BP_FAT  |         |
|------------------------|--------|----------|---------------------|---------|----------------|---------|
| Chromatin Organization |        | Term     | Ribosome Biogenesis |         | RNA Processing |         |
| 42                     |        | Counts   | 18                  |         | 82             |         |
| 6.80E-04               |        | p*       | 2.00E-03            |         | 8.30E-13       |         |
|                        |        | Genes    |                     |         |                |         |
| ASF1A                  | MORF4  |          | BMS1                | XRN2    | CPSF3L         | PPP2CA  |
| ARID2                  | MLL    |          | GTPBP5              | CD2BP2  | CSTF1          | PPP2R1A |
| ARID4B                 | MLL3   |          | GTPBP10             | CDC5L   | CSTF2T         | QKI     |
| BNIP3                  | NAP1L2 |          | IMP3                | DDX1    | EXOSC10        | RPP30   |
| CTR9                   | PHB    |          | SDAD1               | DDX20   | EXOSC4         | RSL1D1  |
| DMAP1                  | RSF1   |          | TSR1                | DDX46   | EXOSC6         | RPL11   |
| H2AFJ                  | TERF2  |          | UTP15               | DHX15   | FUS            | RPL35A  |
| H2AFY                  | TLK1   |          | DCAF13              | DHX38   | GEMIN6         | RPS19   |
| KAT5                   | TLK2   |          | AATF                | DGCR14  | GTF2F1         | SRRM1   |
| PHF15                  | TTF1   |          | RPF1                | GRSF1   | HNRNPC         | RBM39   |
| RCOR1                  | TADA1  |          | EXOSC10             | IMP3    | HNRNPH1        | SNRNP40 |
| SETDB1                 | UIMC1  |          | EXOSC4              | PRPF19  | HNRNPU         | SNRPA1  |
| SMARCA1                | UBE2A  |          | EXOSC6              | PRPF40A | INTS4          | SNRPC   |
| SMARCA5                |        |          | PES1                | RNMT    | LIN28B         | SNRPB   |
| SMARCC1                |        |          | RPL11               | RBM22   | WDR83          | SF3A1   |
| SAP130                 |        |          | RPL35A              | RBM25   | MOCS3          | SF3B1   |
| RERE                   |        |          | RPS19               | RBMS2   | NOVA1          | SF3B2   |
| C11orf30               |        |          | TFB1M               | RNGTT   | NONO           | SFPQ    |
| DAPK3                  |        |          |                     | SRPK2   | NUDT21         | SART3   |
| HP1BP3                 |        |          |                     | SNW1    | PPIE           | SKIV2L2 |
| HAT1                   |        |          |                     | THOC2   | PES1           | SYNCRIP |
| HIST1H3A               |        |          |                     | TRUB2   | PNN            | TRMU    |
| HIST2H4A/4B            |        |          |                     | UTP15   | PLRG1          | TFB1M   |
| HDAC6                  |        |          |                     | DCAF13  | PABPN1         | ZNF638  |
| RBBP4                  |        |          |                     | WBP4    | PCBP1          |         |
| ING4                   |        |          |                     | YBX1    | PCBP2          |         |
| JMJD1C                 |        |          |                     | RSRC1   | PUF60          |         |
| L3MBTL2                |        |          |                     | RPF1    | POLR2J         |         |
| KDM4D                  |        |          |                     | C1orf25 | PTBP1          |         |

Supplemental Table 2: mRNAs whose translation was enriched upon HCMV infection but not UL38 Expression: David Functional Analysis

| GOTERM_BP_FAT   |                | Category | GOTERM_BP_FAT   | GOTERM_BP_FAT |         |         |
|-----------------|----------------|----------|-----------------|---------------|---------|---------|
| Stress Response |                | Term     | Protein Folding | Apoptosis     |         |         |
| 55              |                | Counts   | 22              | 78            |         |         |
| 2.20E-03        |                | p*       | 4.80E-03        | 2.40E-04      |         |         |
|                 |                | Genes    |                 |               |         |         |
| APEX1           | ING4           |          | CLPX            | API5          | CSDA    | PHB     |
| ASF1A           | MBD4           |          | DNAJA1          | BAD           | CUL2    | PROC    |
| FBXO6           | MAPK1          |          | DNAJB6          | BNIP1         | CUL3    | PRKCI   |
| FANCI           | MAPK14         |          | DNAJC5          | BNIP3         | CDKN1B  | PPP2CA  |
| FANCM           | MORF4L1, MORF4 |          | FKBP15          | BNIP3L        | DEDD    | PPP2R1A |
| KAT5            | MLH3           |          | HSPBP1          | DDX20         | DAPK3   | PPP3R1  |
| MBIP            | MYO6           |          | RANBP2          | DNAJB6        | DAD1    | RHOA    |
| PRPF19          | NONO           |          | AIP             | DNAJC5        | DIABLO  | RIPK1   |
| RAD21           | NHEJ1          |          | CANX            | NDUFA13       | EIF5A   | RPL11   |
| RAD51C          | NFE2L2         |          | CCT2            | NDUFS3        | FOXO3/B | YWHAE   |
| RAD51L1         | PRDX1          |          | HSPD1           | ARHGEF2       | GSTP1   | BCLAF1  |
| RIF1            | PRDX2          |          | HSPA8           | SAP30BP       | GSK3B   | TPT1    |
| REV1            | PRDX5          |          | HSPA9           | SCAND1        | HSPD1   | SPHK2   |
| RECQL           | PARP2          |          | HSP90AA1        | SON           | HSPA9   | SOD1    |
| XRCC4           | PSEN1          |          | HSP90AB1        | TRAF4         | HDAC6   | TMBIM6  |
| XRCC5           | PTPLAD1        |          | MPDU1           | WWOX          | ING4    | YWHAB   |
| XRCC6           | RIPK1          |          | NFYC            | XRCC4         | LCK     | YWHAZ   |
| ANKRD17         | RFC1           |          | PPIB            | XRCC5         | MBD4    | UBB     |
| AATF            | SFPQ           |          | PPIE            | ABR           | MAPK1   | UBC     |
| AIFM1           | SMC3           |          | PFDN6           | ANXA4         | MAP3K7  | ZC3HC1  |
| CIB1            | SOD1           |          | TTC1            | APH1A         | NME6    |         |
| CASP9           | TERF2          |          | TBCE            | AATF          | NAIF1   |         |
| C11orf30        | TLK1           |          |                 | AIFM1         | PAK7    |         |
| C12orf44        | TLK2           |          |                 | CREB1         | PRDX1   |         |
| CDK7            | UIMC1          |          |                 | CASP2         | PRDX2   |         |
| FOXO3/B         | UBE2A          |          |                 | CASP8         | PRDX5   |         |
| GSK3B           |                |          |                 | CASP9         | PRAME   |         |
| HDAC6           |                |          |                 | CADM1         | PSEN1   |         |
| FLJ35220        |                |          |                 | CLN8          | PSENE1  |         |

Supplemental Table 2: mRNAs whose translation was enriched upon HCMV infection but not UL38 Expression: David Functional Analysis

| GOTERM_BP_FAT |        |        | Category | GOTERM_BP_FAT              |         |       | GOTERM_BP_FAT |        |
|---------------|--------|--------|----------|----------------------------|---------|-------|---------------|--------|
| Proteolysis   |        |        | Term     | Vesicle Mediated Transport |         |       | Transcription |        |
| 88            |        |        | Counts   | 60                         |         |       | 35            |        |
| 8.70E-03      |        |        | p*       | 2.40E-04                   |         |       | 5.50E-04      |        |
|               |        |        | Genes    |                            |         |       |               |        |
| ATP6AP2       | CUL2   | PSMB4  |          | ARF1                       | CHMP5   | YWHAZ | XRN2          | SNAPC3 |
| BRAP          | CUL3   | PROC   |          | ARF3                       | VIPAR   | USE1  | AFF4          | TRIP4  |
| CLPX          | CUL7   | PIAS4  |          | ARF4                       | COPG    |       | APEX1         | THRB   |
| DZIP3         | DLD    | RFFL   |          | ARF5                       | COPG2   |       | BRF2          | TCEA3  |
| FBXO6         | GAN    | RNF25  |          | ARF6                       | DTNBP1  |       | COPS5         | TCEB2  |
| FBXO7         | HDAC6  | SPCS2  |          | ARFGEF1                    | ELMO2   |       | GABPA         | TTF1   |
| OTUD5         | NPEPPS | TOM1L1 |          | ACTR1A                     | GOSR2   |       | MAX           |        |
| OTUB1         | LAP3   | TRIP12 |          | ATP5B                      | GGA2    |       | SMARCA5       |        |
| RANBP2        | LRRC41 | TCEB2  |          | ATP6V1H                    | GNAI3   |       | TAF11         |        |
| SKP1          | PMPCA  | TRIM5  |          | BNIP1                      | HSPA8   |       | TAF7L         |        |
| SMURF1        | PMPCB  | UQCRC1 |          | ERGIC3                     | HOOK3   |       | YBX1          |        |
| SUMO2         | PSEN1  | UQCRC2 |          | KDELRL1                    | M6PR    |       | BTF3          |        |
| SENPA8        | PSENEN | UBB    |          | KDELRL3                    | MYO6    |       | CREB1         |        |
| UFSP2         | PSMC1  | UBC    |          | NAPG                       | NRBP1   |       | CDK7          |        |
| VPRBP         | PSMC2  | UBE3B  |          | RAB14                      | PI4KB   |       | CDK9          |        |
| WSB1          | PSMC3  | USP28  |          | RAB1A                      | PICALM  |       | FUBP1         |        |
| WDR48         | PSMD1  | USP47  |          | RAB2A                      | PSEN1   |       | GTF2I         |        |
| WWP2          | PSMD11 | USP9Y  |          | RAB5A                      | PACSIN3 |       | GTF2F1        |        |
| XPNPEP1       | PSMD12 | UBE2V1 |          | SAR1B                      | PRKCI   |       | GTF3C3        |        |
| YME1L1        | PSMD13 | UBE2J2 |          | SNAPIN                     | PUM1    |       | HSF2          |        |
| APH1A         | PSMD3  | UBE2A  |          | AP1G1                      | SCAMP1  |       | MED16         |        |
| RNPEP         | PSMD4  | UBE2I  |          | AP1S1                      | SCAMP3  |       | MED23         |        |
| ARIH1         | PSMD6  | UBE2L3 |          | AP2B1                      | SNX1    |       | MED7          |        |
| BTRC          | PSMD7  | UBE2M  |          | AP4M1                      | SNX3    |       | MYEF2         |        |
| CAPN7         | PSMF1  | UBL7   |          | ALS2                       | SNX4    |       | MLL           |        |
| CASP2         | PSMA1  | UBA6   |          | ARCN1                      | STX18   |       | NFE2L2        |        |
| CASP8         | PSMA3  | UBE4B  |          | ARRB1                      | STX4    |       | POLR2J        |        |
| CASP9         | PSMA5  | ZER1   |          | ATL2                       | TRIP10  |       | RSF1          |        |
| CRBN          | PSMB1  | ZC3HC1 |          | ATL3                       | TRAPPC5 |       | SNAPC2        |        |



Supplemental Table 2: mRNAs whose translation was enriched upon HCMV infection but not UL38 Expression: David Functional Analysis

| <b>GOTERM_BP_FAT</b> |          |
|----------------------|----------|
| <b>Metabolism</b>    |          |
| <b>58</b>            |          |
| <b>5.30E-13</b>      |          |
| ADPGK                | CYBA     |
| ATP5F1               | CYB561   |
| ATP5G2               | CYB561D2 |
| ATP5H                | COX411   |
| ATP5A1               | CYC1     |
| ATP5B                | DLST     |
| ATP5C1               | DLD      |
| ATP6V1D              | ETFDH    |
| ATP6V0D1             | ENO1     |
| ATP6V1C1             | EPM2A    |
| ATP6V1H              | GAPDH    |
| ATP6V1B2             | GSK3B    |
| ATP6V1A              | IDH3A    |
| ATP6V0E1             | IDH3B    |
| COX15                | IDH3G    |
| NDUFA1               | LDHB     |
| NDUFA10              | LEPR     |
| NDUFA11              | NNT      |
| NDUFA13              | NRF1     |
| NDUFS2               | OXA1L    |
| NDUFS3               | PGK1     |
| NDUFS7               | PYGL     |
| SCO1                 | PPP1CA   |
| TPI1                 | PDHA1    |
| ACOX1                | SLC25A13 |
| ALDOA                | SDHC     |
| ALDOC                | TXN2     |
| SDHAF2               | UQCRC1   |
| CYBRD1               | UQCRC2   |

Supplemental Table 3: mRNAs whose translation was suppressed upon HCMV infection or UL38 Expression: DAVID Functional Analysis

| Category | GOTERM_BP_FAT   |        | GOTERM_BP_FAT |          |          |         |        | GOTERM_BP_FAT                   |
|----------|-----------------|--------|---------------|----------|----------|---------|--------|---------------------------------|
| Term     | Differentiation |        | Transcription |          |          |         |        | Negative Regulator of Apoptosis |
| Counts   | 39              |        | 124           |          |          |         |        | 25                              |
| p*       | 1.30E-03        |        | 1.00E-03      |          |          |         |        | 3.10E-02                        |
| Genes    | ELAVL3          | TSSK6  | AEBP2         | ATF5     | MLL4     | ZFHX3   | ZNF80  | BCL6                            |
|          | MDGA1           | TNP2   | BCL11A        | ASXL2    | NPAS1    | ZNF131  | ZNF805 | BAG1                            |
|          | NAA15           | ZBTB7B | BCL6          | APOBEC3G | NPAT     | ZNF221  | ZNF844 | CFLAR                           |
|          | PDLIM7          | ZNF281 | BCOR          | ASH1L    | PPARA    | ZNF224  | ZMYM2  | GIMAP1                          |
|          | RASGRP1         | ZNF3   | CNOT4         | BPTF     | POLR2J2  | ZNF230  | XBP1   | SON                             |
|          | TNFSF13         | SQSTM1 | GABPB2        | BRWD1    | PTGER3   | ZNF235  | MYT1   | SOX4                            |
|          | UTP14C          |        | ZGLP1         | CDC73    | PIAS1    | ZNF264  | ZBTB7B | STAMPB                          |
|          | BMP1            |        | KHSRP         | CHD9     | RBPJ     | ZNF281  | ZNF791 | TBX3                            |
|          | BMP5            |        | KCNIP3        | CUX1     | RSF1     | ZNF286A |        | ATF5                            |
|          | CTNNA2          |        | MXD1          | CSRNP3   | SHOX     | ZNF292  |        | ERCC5                           |
|          | C11orf9         |        | MYST3         | EGR4     | SNAPC4   | ZNF3    |        | GCLC                            |
|          | CCDC85B         |        | MYST4         | EREG     | STON1    | ZNF396  |        | HIPK2                           |
|          | DAZ1,2,3,4      |        | NAB1          | EIF2C2   | SUV420H1 | ZNF432  |        | HIPK3                           |
|          | EREG            |        | NAA15         | FOXP4    | SSX3     | ZNF440  |        | APOE                            |
|          | FXR1            |        | POU2F1        | FOXP3    | TCEANC   | ZNF493  |        | IER3                            |
|          | FRZB            |        | POU3F4        | FOXP4    | TBL1XR1  | ZNF529  |        | IL3                             |
|          | GPM6B           |        | RORA          | GMEB1    | TRPS1    | ZNF540  |        | ITSN1                           |
|          | HEMGN           |        | RBM16         | GMEB2    | TRIM24   | ZNF558  |        | NEFL                            |
|          | INSC            |        | SERTAD2       | HNF4A    | TTLL5    | ZNF585A |        | NUP62                           |
|          | JMJD6           |        | SIX5          | HOXB1    | TP63     | ZNF585B |        | PTEN                            |
|          | LGALS3          |        | SOX2          | HOXB3    | UTF1     | ZNF592  |        | PTCRA                           |
|          | MYT1            |        | SOX4          | HIPK2    | UBTF     | ZNF594  |        | PCSK6                           |
|          | NTRK2           |        | SOX5          | HIPK3    | ERG      | ZNF618  |        | SQSTM1                          |
|          | ODF3            |        | SMARCC1       | JMJD6    | ZBTB10   | ZNF626  |        | RTEL1                           |
|          | PPP1R9A         |        | SMARCD3       | JUNB     | ZBTB11   | ZNF653  |        | TP63                            |
|          | RNF151          |        | SP3           | LRRFIP1  | ZBTB33   | ZNF701  |        |                                 |
|          | SIK1            |        | SPIC          | KDM1A    | ZBTB34   | ZNF703  |        |                                 |
|          | SFRP4           |        | TBX3          | KDM2A    | ZBTB38   | ZNF718  |        |                                 |
|          | SEMA6D          |        | TAF4          | MED13    | ZBTB44   | ZNF780B |        |                                 |

Supplemental Table 3: mRNAs whose translation was suppressed upon HCMV infection or UL38 Expression: DAVID Functional Analysis

| GOTERM_BP_FAT                 | Category      | KEGG_PATHWAY                               | SP_PIR_KEYWORDS              | GOTERM_CC_FAT          |         |
|-------------------------------|---------------|--------------------------------------------|------------------------------|------------------------|---------|
| <b>Chromatin Organization</b> | <b>Term</b>   | <b>Antigen Processing and Presentation</b> | <b>Immunoglobulin Domain</b> | <b>Golgi Apparatus</b> |         |
| <b>27</b>                     | <b>Counts</b> | <b>8</b>                                   | <b>29</b>                    | <b>57</b>              |         |
| <b>2.10E-02</b>               | <b>p*</b>     | <b>3.70E-02</b>                            | <b>4.50E-02</b>              | <b>6.70E-04</b>        |         |
| AEBP2                         | <b>Genes</b>  | IFNA1                                      | BOC                          | ARFGEF2                | CUX1    |
| BCOR                          |               | IFNA13                                     | CD2                          | ARL3                   | CLASP1  |
| INO80                         |               | IFNA2                                      | CD200                        | ABCA1                  | DSE     |
| MPHOSPH8                      |               | KIR2DL4                                    | CD22                         | EMID2                  | DPP4    |
| MYST3                         |               | KIR2DL5A                                   | FCRL2                        | FGD6                   | ENTPD4  |
| MYST4                         |               | HLA-DOB                                    | MDGA1                        | GCC2                   | FTCD    |
| SATB1                         |               | HLA-DQB1                                   | VSIG1                        | JAKMIP3                | FUT7    |
| SATB2                         |               | HLA-DQA1                                   | CEACAM7                      | KCNIP3                 | GAD2    |
| SOX2                          |               |                                            | IGHA1                        | MFNG                   | GGA2    |
| SMARCC1                       |               |                                            | IGHA2                        | NAPB                   | GOLGA2  |
| SMARCD3                       |               |                                            | IGHD                         | NAB1                   | GOLGA4  |
| ASH1L                         |               |                                            | IGHG3                        | RAB2A                  | GOLIM4  |
| BPTF                          |               |                                            | IGHG2                        | RASGRP1                | HS2ST1  |
| CDC73                         |               |                                            | IGSF9B                       | SAR1B                  | APOE    |
| CHD9                          |               |                                            | JAM3                         | SEC16A                 | FGF7    |
| HIST1H1B                      |               |                                            | KIR2DL4                      | SEC24A                 | KGFLP2  |
| HIST1H3I                      |               |                                            | KIR2DL5A                     | ST8SIA1                | MAN1A2  |
| JMJD6                         |               |                                            | LRIG2                        | ST8SIA4                | NUFIP2  |
| KDM1A                         |               |                                            | LILRA1                       | B3GNT8                 | PAQR3   |
| KDM2A                         |               |                                            | LILRA2                       | GALNT1                 | PCSK6   |
| MLL4                          |               |                                            | MFAP3L                       | GALNTL1                | SERINC3 |
| RSF1                          |               |                                            | MPZL2                        | AIMP1                  | SLC30A7 |
| SUV420H1                      |               |                                            | NTRK2                        | AVPR2                  | SLC35A1 |
| SYCP3                         |               |                                            | VPREB1                       | ARSB                   | SYNE1   |
| TSSK6                         |               |                                            | PRTG                         | BICD1                  | STX12   |
| TLK2                          |               |                                            | SEMA3F                       | C16orf70               | VPS53   |
| TBL1XR1                       |               |                                            | SIGLEC11                     | CLTB                   | VCPIP1  |
|                               |               |                                            | TMEM25                       | COG6                   | ZDHHC17 |
|                               |               |                                            | UNC5C                        | CUL3                   |         |

Supplemental Table 3: mRNAs whose translation was suppressed upon HCMV infection or UL38 Expression: DAVID Functional Analysis

| GOTERM_BP_FAT |          | Category | GOTERM_CC_FAT                      | GOTERM_BP_FAT   | COG_ONTOLOGY  |
|---------------|----------|----------|------------------------------------|-----------------|---------------|
| Calcium       |          | Term     | Proteinaceous Extracellular Matrix | Lipid Transport | Cell Division |
| 47            |          | Counts   | 21                                 | 16              | 15            |
| 2.40E-02      |          | p*       | 4.50E-02                           | 2.30E-03        | 1.60E-03      |
|               |          | Genes    |                                    |                 |               |
| ADAMTS13      | MAN1A2   |          | ADAMTS13                           | ABCA1           | CTAGE5        |
| EFHB          | MMP11    |          | ADAMTS8                            | ATP9B           | DAB2IP        |
| EHD4          | MMP16    |          | EMID2                              | APOL2           | FKBP15        |
| GPR98         | PON1     |          | AGRN                               | APOL4           | IQCE          |
| KCNIP3        | PON2     |          | CHI3L1                             | FABP2           | RAB11FIP4     |
| RAB11FIP4     | PTHLH    |          | COL1A1                             | APOE            | RASAL3        |
| RASGRP1       | PLA2G12B |          | COL9A2                             | LDLR            | CEP350        |
| S100A14       | PCSK6    |          | COL27A1                            | MTTP            | CCDC144A      |
| GALNT1        | PRKCB    |          | ENTPD2                             | OSBP2           | DSP           |
| GALNTL1       | PPEF2    |          | EPYC                               | OSBPL11         | KIF13A        |
| ABP1          | PCDHB3   |          | ERBB2IP                            | OSBPL8          | NINL          |
| ARSB          | SRL      |          | FLRT3                              | PNLIP           | SYNE1         |
| ARSD          | SLC25A24 |          | GPLD1                              | PPARA           | STAG1         |
| BEST1         | SPOCK3   |          | HMCN2                              | PITPNC1         | STAG2         |
| BMP1          | SPATA21  |          | LGALS3                             | PLEKHA8         | TLK2          |
| CDH10         | TRPM3    |          | MMP11                              | STX12           |               |
| CDH12         | TRPV6    |          | MMP16                              |                 |               |
| CDH4          | TPCN2    |          | SERPINA1                           |                 |               |
| CDH26         |          |          | SPOCK3                             |                 |               |
| CLTB          |          |          | TNXB                               |                 |               |
| DMD           |          |          | WNT9A                              |                 |               |
| ENTPD2        |          |          |                                    |                 |               |
| ENTPD4        |          |          |                                    |                 |               |
| FLG2          |          |          |                                    |                 |               |
| GRIN2A        |          |          |                                    |                 |               |
| GRIN2B        |          |          |                                    |                 |               |
| GRIN3A        |          |          |                                    |                 |               |
| ITPR2         |          |          |                                    |                 |               |
| ITSN1         |          |          |                                    |                 |               |

Supplemental Table 4: mRNAs whose translation are enriched during UL38 expression but not HCMV infection

| Category | GOTERM_BP_FAT |         |        | GOTERM_BP_FAT                             | GOTERM_BP_FAT         | GOTERM_BP_FAT             |
|----------|---------------|---------|--------|-------------------------------------------|-----------------------|---------------------------|
| Term     | Transcription |         |        | Regulation of Cellular Response To Stress | DNA Metabolic Process | Regulation of JNK Cascade |
| Counts   | 71            |         |        | 7                                         | 3.9                   | 5                         |
| p*       | 0.02          |         |        | 0.023                                     | 0.044                 | 0.05                      |
| Genes    | BCL11A        | HMG20B  | ZNF329 | EDN1                                      | DFFA                  | EDN1                      |
|          | BRF1          | HIPK2   | ZNF493 | HIPK2                                     | FBXO4                 | HIPK2                     |
|          | DPF3          | HIF3A   | ZNF548 | MAPK8IP3                                  | GATAD2A               | MAPK8IP3                  |
|          | GABPB2        | IFT57   | ZNF558 | PAK1                                      | PMS1                  | PAK1                      |
|          | GATAD2A       | NR2F2   | ZNF562 | RNF168                                    | PMS2CL                | AKT2                      |
|          | KLF7          | NFYB    | ZNF575 | TMEM189                                   | PMS2                  |                           |
|          | LIMD1         | NACC1   | ZNF587 | AKT2                                      | RAD18                 |                           |
|          | LHX9          | PPARA   | ZNF599 |                                           | RAD52                 |                           |
|          | MXD1          | PBX3    | ZNF611 |                                           | RECQL4                |                           |
|          | MAMSTR        | PKIA    | ZNF618 |                                           | CEP164                |                           |
|          | MLXIP         | RUNX1T1 | ZNF621 |                                           | CYCS                  |                           |
|          | MDM4          | SQSTM1  | ZNF677 |                                           | ESCO2                 |                           |
|          | PKNOX1        | ZNF605  | ZNF710 |                                           | KRT7                  |                           |
|          | SLC2A4RG      | TCEB3   | ZNF765 |                                           | RNASEH1               |                           |
|          | SOX11         | TFAP2A  | ZNF791 |                                           | RPS27L                |                           |
|          | SOX4          | TCFL5   | ANP32A |                                           | RNF168                |                           |
|          | TSC22D2       | TMEM189 | HMGA2  |                                           | TTC5                  |                           |
|          | BNC1          | UBP1    | ZFP30  |                                           | TOP3A                 |                           |
|          | CAMKK2        | MYB     | ZNF320 |                                           |                       |                           |
|          | CTNNBIP1      | VAX2    |        |                                           |                       |                           |
|          | CDYL          | VDR     |        |                                           |                       |                           |
|          | CCDC85B       | ZBTB8B  |        |                                           |                       |                           |
|          | DGKQ          | ZNF783  |        |                                           |                       |                           |
|          | EGR1          | ZNF100  |        |                                           |                       |                           |
|          | EGR2          | ZNF17   |        |                                           |                       |                           |
|          | EGR3          | ZNF197  |        |                                           |                       |                           |

Supplemental Table 4: mRNAs whose translation are enriched during UL38 expression but not HCMV infection

| Category | GOTERM_BP_FAT                                                                                                                                                                                                               | GOTERM_BP_FAT                                                                                                               | GOTERM_CC_FAT                                                                                                                                                                                                                                       |                                                                                               |
|----------|-----------------------------------------------------------------------------------------------------------------------------------------------------------------------------------------------------------------------------|-----------------------------------------------------------------------------------------------------------------------------|-----------------------------------------------------------------------------------------------------------------------------------------------------------------------------------------------------------------------------------------------------|-----------------------------------------------------------------------------------------------|
| Term     | Cellular Macromolecule Catabolic Process                                                                                                                                                                                    | Response to DNA Damage Stimulus                                                                                             | Cytoskeleton                                                                                                                                                                                                                                        |                                                                                               |
| Counts   | 24                                                                                                                                                                                                                          | 14                                                                                                                          | 36                                                                                                                                                                                                                                                  |                                                                                               |
| p*       | 0.038                                                                                                                                                                                                                       | 0.057                                                                                                                       | 0.02                                                                                                                                                                                                                                                |                                                                                               |
| Genes    | ADAM9<br>ATG10<br>DFFA<br>FBXL17<br>FBXO4<br>FBXO46<br>HECTD2<br>RAB40B<br>RAD18<br>XIAP<br>ARIH2<br>CLN8<br>CYCS<br>EIF2C4<br>KLHL3<br>MIB2<br>RNASEH1<br>RNF168<br>SQSTM1<br>CACYPB<br>USP42<br>USP7<br>TMEM189<br>UBE2D4 | PMS1<br>PMS2CL<br>PMS2<br>RAD18<br>RAD52<br>RECQL4<br>XIAP<br>CEP164<br>DYRK2<br>ESCO2<br>HIPK2<br>RPS27L<br>RNF168<br>TTC5 | ACTR3B<br>CDK5RAP2<br>FRMD4A<br>FRMD8<br>ARHGAP24<br>ARHGAP32<br>SH3KBP1<br>WIPF1<br>ANXA11<br>CEP164<br>CCDC85B<br>CYLC1<br>DGKQ<br>DVL1<br>EML3<br>FEZ1<br>FERMT1<br>FHL3<br>GAS2L1<br>HIPK2<br>IFT57<br>IFT80<br>KLHL2<br>KLHL3<br>KRT19<br>KRT7 | KIF1C<br>MYO3B<br>OPHN1<br>SHROOM2<br>STX1A<br>TMSB15B<br>TTN<br>TBCD<br>KRTAP4-7<br>KRTAP4-9 |

Supplemental Table 5: Subanalysis of *Cell cycle, mitochondrion, apoptosis, RNA processing stress-response* terms from Supplementary Table 1 and Table 2

**Cell Cycle**

| Category      | Term                                      | Counts | %    | Pvalue   | Genes                                                                                                                                                                                                                   |
|---------------|-------------------------------------------|--------|------|----------|-------------------------------------------------------------------------------------------------------------------------------------------------------------------------------------------------------------------------|
| GOTERM_BP_FAT | Mitosis                                   | 32     | 26   | 9.70E-29 | CLIP1 SEH1L CCNB1 NDE1 SMC3 ZC3HC1<br>MAD2L2 SETD8 DCTN2 PES1 HAUS7 ZNF830<br>NIPBL WEE1 KIF22 PPP5C TUBB2A TGFB2<br>PDS5B BUB1 MAPRE3 SGOL1 TUBB2B<br>RAD21 BUB3 NUDC CDK11A/B TUBB<br>ARHGEF2 CETN2 NUP43 STAG2 UBE2I |
| GOTERM_BP_FAT | Cell Cycle Arrest                         | 17     | 13.8 | 7.80E-16 | UHMK1 AK1 CDC123 CUL2 CUL3 VASH1<br>CDKN1B CDKN2D GAS1 ING4 ILK<br>IRF6 PML PPP2R3B TBRG1 TBRG4                                                                                                                         |
| GOTERM_BP_FAT | Interphase                                | 13     | 10.6 | 1.80E-10 | CDC123 CUL2 CUL3 CCNB1 CDK10 PPP6C<br>CDKN1B CDKN2D ID4 KPNA2 PPP2R3B TBRG4<br>TPD52L1                                                                                                                                  |
| GOTERM_BP_FAT | Meiosis                                   | 11     | 8.9  | 1.80E-08 | CKS2 DMC1 RAD1 RAD21 RAD51C SMC3<br>RAD51L1 MLH3 PSMD13 SGOL1 STAG2                                                                                                                                                     |
| GOTERM_BP_FAT | Response to DNA Damage                    | 18     | 14.6 | 3.90E-08 | FANCI RAD1 RAD21 RAD51C RAD51L1 HAUS7<br>RIF1 CDK7 CDKN2D ING4 KIF22 TLK1<br>MAPK1 MLH3 PML SMC3 TERF2 TLK2                                                                                                             |
| GOTERM_BP_FAT | Chromosome Segregation                    | 11     | 8.9  | 2.70E-09 | NIPBL PDS5B RAD21 RAD51C SEH1L BUB3<br>NUP43 SGOL1 STAG2 SMC3 UBE2I                                                                                                                                                     |
| GOTERM_BP_FAT | G1/S transition of the mitotic cell cycle | 6      | 4.9  | 1.50E-04 | CUL2 CUL3 CDKN1B CDKN2D ID4 PPP6C<br>DCTN2 DYNC1H1 NDE1 RANBP1 SMC3 HAUS7<br>TUBB                                                                                                                                       |
| GOTERM_BP_FAT | Cytoskeletal Organization                 | 13     | 10.6 | 5.70E-04 | CKS2 PRR5 ARHGEF2 SEH1L BIN3 CETN2                                                                                                                                                                                      |
| GOTERM_BP_FAT | DNA Replication                           | 8      | 6.5  | 1.70E-03 | RAD1 CDT1 CINP CDKN2D RBBP4 ING4<br>TERF2 TBRG1                                                                                                                                                                         |
| GOTERM_BP_FAT | Regulation of Apoptosis                   | 17     | 13.8 | 2.30E-03 | ARHGEF2 CUL2 CUL3 CDKN1B CDKN2D GSK3B<br>GAS1 ING4 ILK KRT18 MAPK1 ZC3HC1<br>PML TGFB2 TUBB UBB UBC                                                                                                                     |

Supplemental Table 5: Subanalysis of *Cell cycle, mitochondrion, apoptosis, RNA processing stress-response* terms from Supplementary Table 1 and Table 2

**Mitochondrion**

| Category      | Term                                    | Counts | %    | Pvalue   | Genes                                                                         |
|---------------|-----------------------------------------|--------|------|----------|-------------------------------------------------------------------------------|
| GOTERM_BP_FAT | mitochondrial transport                 | 11     | 13.1 | 3.40E-12 | ATP5O ATP5D BAK1 BAX PPIF SLC25A6<br>SLC25A10 SLC25A30 SLC25A37 TIMM10 TOMM22 |
| GOTERM_BP_FAT | mitochondrial membrane organization     | 6      | 7.1  | 7.70E-07 | BAK1 BAX PPIF SAMM50 TIMM10 TOMM22                                            |
| GOTERM_BP_FAT | Oxidative Phosphorylation               | 6      | 7.1  | 2.00E-04 | ATP5G2 ATP5O ATP5D NDUFA7 NDUFB7 NDUFS6                                       |
| GOTERM_BP_FAT | Translation                             | 8      | 9.5  | 2.20E-03 | MRPL12 MRPL23 MRPL4 MRPL9 MRPS10 MRPS16<br>COG8, PDF SARS2                    |
| GOTERM_BP_FAT | regulation of defense response to virus | 3      | 3.6  | 4.80E-03 | AP2M1 APOBEC3F APOBEC3G                                                       |

**Apoptosis**

| Category      | Term                                              | Counts | %  | Pvalue   | Genes                                                                                        |
|---------------|---------------------------------------------------|--------|----|----------|----------------------------------------------------------------------------------------------|
| GOTERM_BP_FAT | Cell cycle arrest                                 | 9      | 8  | 2.40E-06 | CUL2 CUL3 CDKN1B CDKN2D GAS1 ING4<br>ILK PML TGFB2                                           |
| GOTERM_BP_FAT | Response to DNA damage stimulus                   | 15     | 13 | 3.00E-06 | BAX XRCC4 XRCC5 AATF AIFM1 CASP9<br>CDKN2D FOXO3B, FING4 MBD4 MAPK1 SOD1<br>PHLDA3 PSEN1 PML |
| GOTERM_BP_FAT | Immune system development                         | 13     | 11 | 3.60E-06 | BAK1 BAX SCAND1 XRCC4 XRCC5 CASP8<br>HSPD1 LCK PRDX2 PSEN1 PML TGFB2<br>SOD1                 |
| GOTERM_BP_FAT | Regulation of cell size                           | 11     | 10 | 9.30E-06 | NDUFA13 NDUFS3 CREB1 CLN8 CDKN1B CDKN2D<br>ILK PML PPP2CA PPP2R1A TGFB2                      |
| GOTERM_BP_FAT | DNA fragmentation involved in apoptosis           | 4      | 4  | 5.10E-04 | BAX BNIP3 AIFM1 SOD1                                                                         |
| GOTERM_BP_FAT | Response to nutrient levels                       | 8      | 7  | 1.40E-03 | ASNS CDKN2D DAD1 DDAH2 HDAC6 PTENP1<br>PSEN1 SOD1                                            |
| GOTERM_BP_FAT | Response to radiation                             | 8      | 7  | 1.50E-03 | BAK1 BAX XRCC4 CASP6 CASP9 CDKN2D<br>MBD4 PML                                                |
| GOTERM_BP_FAT | posttranscriptional regulation of gene expression | 8      | 7  | 2.00E-03 | NDUFA13 EIF5A HSPB1 HSPD1 MAPK1 PTENP1<br>PML PRKRA                                          |



Supplemental Table 5: Subanalysis of *Cell cycle, mitochondrion, apoptosis, RNA processing stress-response* terms from Supplementary Table 1 and Table 2

**RNA Processing**

| Category      | Term                                              | Counts | %    | Pvalue   | Genes                                                                                                                                                                                                                  |
|---------------|---------------------------------------------------|--------|------|----------|------------------------------------------------------------------------------------------------------------------------------------------------------------------------------------------------------------------------|
|               | nuclear mRNA splicing, via spliceosome            | 32     | 39   | 2.60E-40 | CD2BP2 DDX1 DDX20 DHX38 RBM25 SRPK2<br>SNW1 YBX1 RSRC1 CSTF1 FUS GEMIN6<br>GTF2F1 HNRNPC HNRNPH1 HNRNPU WDR83 NOVA1<br>NUDT21 PABPN1 PCBP1 PCBP2 POLR2J PTBP1<br>SRRM1 SNRNP40 SNRPA1 SNRPC SNRPB SF3A1<br>SF3B1 SF3B2 |
| GOTERM_BP_FAT | rRNA processing                                   | 12     | 14.6 | 1.00E-11 | IMP3 UTP15 DCAF13 RPF1 EXOSC10 EXOSC4<br>EXOSC6 PES1 RPL11 RPL35A RPS19 TFB1M                                                                                                                                          |
| GOTERM_BP_FAT | tRNA processing                                   | 5      | 6.1  | 1.10E-03 | TRUB2 C1orf25 MOCS3 RPP30 TRMU                                                                                                                                                                                         |
| GOTERM_BP_FAT | RNA stabilization                                 | 3      | 3.7  | 3.50E-03 | YBX1 HNRNPU SYNCRIP                                                                                                                                                                                                    |
| GOTERM_BP_FAT | posttranscriptional regulation of gene expression | 6      | 7.3  | 8.70E-03 | DDX1 YBX1 HNRNPU LIN28B QKI SYNCRIP                                                                                                                                                                                    |
| GOTERM_BP_FAT | mRNA capping                                      | 2      | 2.4  | 2.40E-02 | RNMT RNGTT                                                                                                                                                                                                             |

**Stress Response**

| Category      | Term                                     | Counts | %    | Pvalue   | Genes                                                                                 |
|---------------|------------------------------------------|--------|------|----------|---------------------------------------------------------------------------------------|
| GOTERM_BP_FAT | DNA recombination                        | 10     | 18.2 | 2.90E-10 | RAD21 RAD51C RAD51L1 RECQL XRCC4 XRCC5<br>XRCC6 MLH3 NONO SFPQ                        |
| GOTERM_BP_FAT | DSB repair via nonhomologous end joining | 4      | 7.3  | 7.10E-06 | XRCC4 XRCC5 XRCC6 NHEJ1                                                               |
| GOTERM_BP_FAT | cell cycle                               | 14     | 25.5 | 8.20E-06 | FANCI RAD21 RAD51C RAD51L1 RIF1 CDK7<br>GSK3B ING4 MAPK1 MLH3 SMC3 TERF2<br>TLK1 TLK2 |
| GOTERM_BP_FAT | cellular response to oxidative stress    | 5      | 9.1  | 2.50E-05 | HDAC6 PRDX1 PRDX2 PRDX5 SOD1                                                          |
| GOTERM_BP_FAT | telomere maintenance                     | 4      | 7.3  | 1.80E-04 | XRCC5 XRCC6 RFC1 TERF2                                                                |
| GOTERM_BP_FAT | induction of apoptosis                   | 8      | 14.5 | 2.60E-04 | AATF AIFM1 FOXO3B, FMBD4 MAPK1 PRDX1<br>PSEN1 RIPK1                                   |
| GOTERM_BP_FAT | response to ionizing radiation           | 4      | 7.3  | 1.80E-03 | XRCC4 XRCC6 NHEJ1 UIMC1                                                               |
| GOTERM_BP_FAT | base-excision repair                     | 3      | 5.5  | 5.10E-03 | APEX1 MBD4 PARP2                                                                      |
| GOTERM_BP_FAT | cellular response to starvation          | 3      | 5.5  | 7.20E-03 | C12orf44 HDAC6 PSEN1                                                                  |
| GOTERM_BP_FAT | anti-apoptosis                           | 5      | 9.1  | 9.10E-03 | AATF GSK3B PRDX2 PSEN1 SOD1                                                           |
| GOTERM_BP_FAT | autophagy                                | 3      | 5.5  | 1.00E-02 | C12orf44 HDAC6 PSEN1                                                                  |

Supplementary Figure 6: 5' UTR analysis of mRNAs that are translationally regulated during HCMV infection

|                         | <b>Avg 5'UTR length</b> | <b>%GC</b> |
|-------------------------|-------------------------|------------|
| HCMV/UL38 Upregulated   | 311                     | 0.64       |
| HCMV Upregulated        | 346                     | 0.63       |
| HCMV/UL38 Downregulated | 382                     | 0.62       |

Supplemental Table 7: TOP motif-bearing mRNAs recruited to polysomes during UL38 stimulation and/or HCMV infection

| HCMV/UL38 stimulated |                    | HCMV stimulated    |                    |              |          |
|----------------------|--------------------|--------------------|--------------------|--------------|----------|
| <u>Refseq_mRNA</u>   | <u>Gene Symbol</u> | <u>Refseq_mRNA</u> | <u>Gene Symbol</u> |              |          |
| 1                    | NM_001001396       | ATP2B4             | 32                 | NM_032873    | UBASH3B  |
| 2                    | NM_001146310       | C1orf86            | 33                 | NM_014312    | VSIG2    |
| 3                    | NM_001185094       | NIT1               | 34                 | NM_006331    | EMG1     |
| 4                    | NM_001277223       | TAGLN2             | 35                 | NM_012461    | TINF2    |
| 5                    | NM_001684          | ATP2B4             | 36                 | NM_001099274 | TINF2    |
| 6                    | NM_003564          | TAGLN2             | 37                 | NM_033250    | PML      |
| 7                    | NM_006608          | PHTF1              | 38                 | NM_033249    | PML      |
| 8                    | NM_001135659       | NRXN1              | 39                 | NM_002675    | PML      |
| 9                    | NM_004801          | NRXN1              | 40                 | NM_033246    | PML      |
| 10                   | NM_138735          | NRXN1              | 41                 | NM_033244    | PML      |
| 11                   | NM_001035521       | GTF3C2             | 42                 | NM_033240    | PML      |
| 12                   | NM_001521          | GTF3C2             | 43                 | NM_033239    | PML      |
| 13                   | NM_001381          | DOK1               | 44                 | NM_033238    | PML      |
| 14                   | NM_002823          | PTMA               | 45                 | NM_033247    | PML      |
| 15                   | NM_001099285       | PTMA               | 46                 | NM_001003    | RPLP1    |
| 16                   | NM_020701          | ISY1               | 47                 | NM_213725    | RPLP1    |
| 17                   | NM_001199469       | ISY1               | 48                 | NM_002952    | RPS2     |
| 18                   | NM_000995          | RPL34              | 49                 | NM_001128827 | DLG4     |
| 19                   | NM_021177          | LSM2               | 50                 | NM_018096    | NLE1     |
| 20                   | NM_001402          | EEF1A1             | 51                 | NM_001014445 | NLE1     |
| 21                   | NM_001199464       | PDCD2              | 52                 | NM_001961    | EEF2     |
| 22                   | NM_001199463       | PDCD2              | 53                 | NM_001005335 | HNRNPL   |
| 23                   | NM_001199462       | PDCD2              | 54                 | NM_001013    | RPS9     |
| 24                   | NM_032983          | CASP2              | 55                 | NM_014501    | UBE2S    |
| 25                   | NM_032982          | CASP2              | 56                 | NM_007367    | RALY     |
| 26                   | NM_015878          | AZIN1              | 57                 | NM_016732    | RALY     |
| 27                   | NM_148174          | AZIN1              | 58                 | NM_203417    | RCAN1    |
| 28                   | NM_032928          | TMEM141            | 59                 | NM_013327    | PARVB    |
| 29                   | NM_001171689       | AMMECR1            | 60                 | NM_001084392 | DDT      |
| 30                   | NM_006201          | CDK16              |                    |              |          |
| 31                   | NM_001177660       | HABP2              |                    |              |          |
|                      |                    |                    | 61                 | NM_014873    | LPGAT1   |
|                      |                    |                    | 62                 | NM_001277223 | TAGLN2   |
|                      |                    |                    | 63                 | NM_003564    | TAGLN2   |
|                      |                    |                    | 64                 | NM_001177665 | RIF1     |
|                      |                    |                    | 65                 | NM_001037631 | CTLA4    |
|                      |                    |                    | 66                 | NM_005214    | CTLA4    |
|                      |                    |                    | 67                 | NM_004622    | TSN      |
|                      |                    |                    | 68                 | NM_001261401 | TSN      |
|                      |                    |                    | 69                 | NM_001690    | ATP6V1A  |
|                      |                    |                    | 70                 | NM_001005474 | NFKBIZ   |
|                      |                    |                    | 71                 | NM_015173    | TBC1D1   |
|                      |                    |                    | 72                 | NM_001253912 | TBC1D1   |
|                      |                    |                    | 73                 | NM_001104631 | PDE4D    |
|                      |                    |                    | 74                 | NM_012343    | NNT      |
|                      |                    |                    | 75                 | NM_024337    | IRX1     |
|                      |                    |                    | 76                 | NM_015288    | PHF15    |
|                      |                    |                    | 77                 | NM_003447    | ZNF165   |
|                      |                    |                    | 78                 | NM_175061    | JAZF1    |
|                      |                    |                    | 79                 | NM_032983    | CASP2    |
|                      |                    |                    | 80                 | NM_032982    | CASP2    |
|                      |                    |                    | 81                 | NM_018941    | CLN8     |
|                      |                    |                    | 82                 | NM_003406    | YWHAZ    |
|                      |                    |                    | 83                 | NM_152786    | C9orf43  |
|                      |                    |                    | 84                 | NM_006603    | STAG2    |
|                      |                    |                    | 85                 | NM_001042750 | STAG2    |
|                      |                    |                    | 86                 | NM_001042751 | STAG2    |
|                      |                    |                    | 87                 | NM_001193417 | DDX3X    |
|                      |                    |                    | 88                 | NM_001193416 | DDX3X    |
|                      |                    |                    | 89                 | NM_001356    | DDX3X    |
|                      |                    |                    | 90                 | NM_014456    | PDCD4    |
|                      |                    |                    | 91                 | NM_145341    | PDCD4    |
|                      |                    |                    | 92                 | NM_001199492 | PDCD4    |
|                      |                    |                    | 93                 | NM_018259    | TTC17    |
|                      |                    |                    | 94                 | NM_015231    | NUP160   |
|                      |                    |                    | 95                 | NM_006597    | HSPA8    |
|                      |                    |                    | 96                 | NM_153201    | HSPA8    |
|                      |                    |                    | 97                 | NM_152713    | STT3A    |
|                      |                    |                    | 98                 | NM_001190977 | YAF2     |
|                      |                    |                    | 99                 | NM_001769    | CD9      |
|                      |                    |                    | 100                | NM_004064    | CDKN1B   |
|                      |                    |                    | 101                | NM_002300    | LDHB     |
|                      |                    |                    | 102                | NM_001206710 | PRKAG1   |
|                      |                    |                    | 103                | NM_005967    | NAB2     |
|                      |                    |                    | 104                | NM_001009894 | C12orf29 |
|                      |                    |                    | 105                | NM_003295    | TPT1     |
|                      |                    |                    | 106                | NM_002515    | NOVA1    |
|                      |                    |                    | 107                | NM_006491    | NOVA1    |
|                      |                    |                    | 108                | NM_006489    | NOVA1    |
|                      |                    |                    | 109                | NM_001164814 | ACIN1    |
|                      |                    |                    | 110                | NM_014977    | ACIN1    |
|                      |                    |                    | 111                | NM_001164815 | ACIN1    |
|                      |                    |                    | 112                | NM_012461    | TINF2    |
|                      |                    |                    | 113                | NM_001099274 | TINF2    |
|                      |                    |                    | 114                | NM_182758    | WDR72    |
|                      |                    |                    | 115                | NM_144598    | LRRC28   |
|                      |                    |                    | 116                | NM_171846    | LACTB    |
|                      |                    |                    | 117                | NM_032857    | LACTB    |
|                      |                    |                    | 118                | NM_001003    | RPLP1    |
|                      |                    |                    | 119                | NM_213725    | RPLP1    |
|                      |                    |                    | 120                | NM_007014    | WWP2     |
|                      |                    |                    | 121                | NM_001270455 | WWP2     |
|                      |                    |                    | 122                | NM_001270454 | WWP2     |
|                      |                    |                    | 123                | NM_000196    | HSD11B2  |
|                      |                    |                    | 124                | NM_014003    | DHX38    |
|                      |                    |                    | 125                | NM_001002841 | MYL4     |
|                      |                    |                    | 126                | NM_006801    | KDELRL1  |
|                      |                    |                    | 127                | NM_004461    | FARSA    |
|                      |                    |                    | 128                | NM_006814    | PSMF1    |
|                      |                    |                    | 129                | NM_144703    | LSM14B   |
|                      |                    |                    | 130                | NM_001135161 | COMT     |

Supplemental Table 8: DAVID functional analysis of TOP bearing mRNAs in Supplementary Table 6

| Category      | Term                                                                                 | Counts | %   | p-val    | Genes                                                      |
|---------------|--------------------------------------------------------------------------------------|--------|-----|----------|------------------------------------------------------------|
| GOTERM_BP_FAT | Translational elongation                                                             | 6      | 7.3 | 1.40E-04 | eEF1A1,EEF2,RPL34,RPS2,RPS9, RPLP1                         |
| GOTERM_BP_FAT | Translation                                                                          | 7      | 8.5 | 5.80E-03 | eEF1A1,EEF2,FARSA,<br>RPL34,RPS2,RPS9,RPLP1                |
| GOTERM_BP_FAT | Transmission of Nerve Impulse                                                        | 7      | 8.5 | 7.60E-03 | CD9,NAB2COMT,CLN8,DLG4,NRXN1,<br>NOVA1                     |
| GOTERM_BP_FAT | Negative Regulation of Macromolecule Metabolic Process                               | 10     | 12  | 9.90E-03 | JAZF1,NAB2,TINF2,WWP2,YAF2,CLN8,CDK<br>N1B,PDCD4,PML,PSMF1 |
| GOTERM_BP_FAT | RNA splicing                                                                         | 6      | 7.3 | 1.30E-02 | DHX38,ISY1,LSM2,RALY,NOVA1, HNRNPL                         |
| GOTERM_BP_FAT | Negative Reg. of Nitrogen Compound Metabolic Process                                 | 8      | 9.8 | 1.40E-02 | JAZF1,NAB2,TINF2,YAF2,COMT,<br>CDKN1B,PDCD4,PML            |
| GOTERM_BP_FAT | mRNA Processing                                                                      | 6      | 7.3 | 2.10E-02 | DHX38,ISY1,LSM2,RALY,NOVA1, HNRNPL                         |
| GOTERM_BP_FAT | Neg. Reg. of Cell Proliferation                                                      | 6      | 7.3 | 3.30E-02 | CD9,TINF2,COMT,CDKN1B,CTLA4,PML                            |
| GOTERM_BP_FAT | learning                                                                             | 3      | 3.7 | 3.60E-02 | COMT,CLN8,DLG4                                             |
| GOTERM_BP_FAT | mRNA metabolic process                                                               | 6      | 7.3 | 3.60E-02 | DHX38,ISY1,LSM2,RALY,NOVA1, HNRNPL                         |
| GOTERM_BP_FAT | Neg. Reg. of Gene Expression                                                         | 7      | 8.5 | 3.80E-02 | JAZF1,NAB2,WWP2,YAF2,CDKN1B,<br>PDCD4,PML                  |
| GOTERM_BP_FAT | RNA splicing, via transesterification reactions with bulged adenosine as nucleophile | 4      | 4.9 | 4.00E-02 | DHX38,LSM2,NOVA1,HNRNPL                                    |
| GOTERM_BP_FAT | Nuclear mRNA splicing, via spliceosome                                               | 4      | 4.9 | 4.00E-02 | DHX38,LSM2,NOVA1,HNRNPL                                    |

Supplementary Table 9: Overlap in translation signatures with other translateome studies

| <b>Badura et al</b>                                                                                  |          |          |         |        |         |          |          |          |
|------------------------------------------------------------------------------------------------------|----------|----------|---------|--------|---------|----------|----------|----------|
| Query List: Translationally upregulated mRNAs in IR treated MCF10a cells where eIF4G1 is upregulated |          |          |         |        |         |          |          |          |
| Target List: HCMV induced translationally upregulated genes                                          |          |          |         |        |         |          |          |          |
| p= 0                                                                                                 |          |          |         |        |         |          |          |          |
| Overlapping Genes:                                                                                   |          |          |         |        |         |          |          |          |
| ACADSB                                                                                               | BBX      | DDX46    | GNPDA2  | MLH3   | PEX13   | RAB3GAP2 | SLC41A2  | TAB3     |
| ACOX1                                                                                                | BCLAF1   | DDX6     | HNRNPU  | MLL    | PGK1    | RANBP9   | SLC4A1AP | TBC1D12  |
| ACTR2                                                                                                | BNIP3L   | DIAPH2   | HOOK3   | MR1    | PGM3    | RBBP4    | SMARCA1  | TBC1D8B  |
| AFF4                                                                                                 | BRAP     | DZIP3    | HP1BP3  | MYEF2  | PICALM  | RBM25    | SMARCA5  | THOC2    |
| AKAP12                                                                                               | BUB1     | EIF4G3   | HSPA4   | MYO6   | PIK3C2A | RECQL    | SMC3     | TLK1     |
| ANKHD1                                                                                               | C11orf30 | EIF5B    | IFNGR1  | NAMPT  | PLAA    | REV1     | SMEK1    | TLK2     |
| API5                                                                                                 | C1orf25  | EPB41L2  | INPP4A  | NAPG   | PLEKHA1 | RFC1     | SNX1     | TMOD3    |
| APPBP2                                                                                               | C3orf38  | EPB41L4A | IRF6    | NDFIP2 | PLRG1   | RIF1     | SNX4     | TOR1AIP2 |
| ARFGEF1                                                                                              | CANX     | EPM2AIP1 | JAZF1   | NFKBIZ | PNN     | RIOK3    | SPG20    | TTF1     |
| ARIH1                                                                                                | CAPN7    | FANCM    | JMJD1C  | NIPBL  | PRKAA1  | RIPK1    | SRPK2    | UBA6     |
| ARL6IP5                                                                                              | CASK     | FNDC3B   | KIF3A   | NPEPPS | PRKCI   | RNGTT    | SS18     | UBE4B    |
| ASF1A                                                                                                | CDC5L    | FUBP1    | KRIT1   | NRP2   | PRPF40A | RSF1     | SSH2     | UBXN4    |
| ATL2                                                                                                 | CDK8     | FXR1     | LARP4   | NT5DC1 | PSMC2   | RSL1D1   | SSR1     | USP28    |
| ATP6AP2                                                                                              | CHMP2B   | G3BP1    | LPGAT1  | NUMB   | PSMD12  | RSRC1    | STAG2    | USP47    |
| ATP6V1A                                                                                              | CTNNA1   | GABPA    | LRRFIP1 | ORMDL1 | PSPC1   | SCAMP1   | STAM2    | UTP15    |
| ATP6V1C1                                                                                             | CUL2     | GALNT7   | MAP3K7  | PCM1   | QKI     | SGCB     | STK38    | VPS53    |
| BAZ2B                                                                                                | CUL3     | GAN      | MATR3   | PDCD4  | QRSL1   | SKAP2    | STXBP4   | WAC      |
| BBS9                                                                                                 | DDX18    | GFM2     | MFN1    | PDE4D  | RAB2A   | SKIV2L2  | SYNCRIP  | WAPAL    |
| WBP4                                                                                                 | WDR48    | YLPM1    | YTHDC2  | ZBTB44 | ZFR     | ZNF165   | ZNF638   | ZNF654   |

| <b>Badura et al</b>                                                                                 |       |       |       |       |       |        |       |         |
|-----------------------------------------------------------------------------------------------------|-------|-------|-------|-------|-------|--------|-------|---------|
| Query List: Translationally downregulated mRNAs in IR treated MCF10a cells where eIF4G1 is depleted |       |       |       |       |       |        |       |         |
| Target List: HCMV/UL38 induced translationally upregulated genes                                    |       |       |       |       |       |        |       |         |
| p= 0 .00927                                                                                         |       |       |       |       |       |        |       |         |
| Overlapping Genes:                                                                                  |       |       |       |       |       |        |       |         |
| AP1S3                                                                                               | CASP2 | CENPO | GINS3 | KPNA2 | NUP43 | RFC2   | TMPO  | NFKBIL2 |
| ARHGDI1                                                                                             | CBX5  | CKS2  | GINS4 | MCM5  | OBSL1 | S100A4 | TYMS  | RAD1    |
| B4GALT6                                                                                             | CCNB1 | CYB5B | H2AFZ | MYBL2 | PHTF1 | SAP30L | UBE2S | TK1     |
| CALM1                                                                                               | CDT1  | EIF4E | H3F3B | MYO19 | PPIL5 | SGOL1  | UBE2T | VTI1B   |
| CAMK4                                                                                               | CENPM | G3BP1 | HADH  |       |       |        |       |         |

| <b>Mamame et al</b>                                                             |       |       |      |      |       |       |       |       |
|---------------------------------------------------------------------------------|-------|-------|------|------|-------|-------|-------|-------|
| Query List: Translationally upregulated mRNAs in eIF4E overexpressing 3T3 cells |       |       |      |      |       |       |       |       |
| Target List: HCMV induced translationally upregulated genes                     |       |       |      |      |       |       |       |       |
| p= 0.0421                                                                       |       |       |      |      |       |       |       |       |
| Overlapping Genes:                                                              |       |       |      |      |       |       |       |       |
| COPE                                                                            | PMM1  | RGS12 | DCTD | PSPH | SSNA1 | GNAI2 | RBBP9 | TREX1 |
| COX8A                                                                           | PRKRA | SEH1L | EIF1 | QDPR | STX17 | H2AFZ | RGS12 | TROAP |

Supplementary Table 9: Overlap in translation signatures with other translateome studies

| <b>Larsson et al</b>                                                             |           |       |       |          |        |        |        |          |
|----------------------------------------------------------------------------------|-----------|-------|-------|----------|--------|--------|--------|----------|
| Query List: Translationally down-regulated mRNAs in metformin treated MCF7 cells |           |       |       |          |        |        |        |          |
| Target List: HCMV/UL38 induced translationally upregulated genes                 |           |       |       |          |        |        |        |          |
| p= 0                                                                             |           |       |       |          |        |        |        |          |
| Overlapping Genes:                                                               |           |       |       |          |        |        |        |          |
| ACAT2                                                                            | ATP50     | CENPW | EIF1  | GIN54    | MRPL12 | PARVB  | PSPH   | SLC25A10 |
| ACER3                                                                            | C10orf140 | CLN6  | EIF6  | GPN2     | MRPL23 | PFDN6  | RANBP1 | SRSF1    |
| ACOT7                                                                            | C11orf1   | CYB5B | EMG1  | HAUS7    | MRPL54 | PIR    | RFC2   | SRSF6    |
| ADK                                                                              | C12orf48  | DMC1  | ETNK1 | LUC7L    | MRTO4  | POLR3C | RFXANK | TIMM10   |
| ALG13                                                                            | C3orf75   | DNLZ  | FAH   | MCM5     | NDUFS6 | POLR3K | RQCD1  | TK1      |
| ASNS                                                                             | C7orf44   | DOHH  | GALE  | MED22    | NUDT1  | PPIF   | S100A4 | TMEM138  |
| ATP5D                                                                            | CCND3     | DTYMK | GIN53 | METTL11A | ORC5   | PSME2  | SIP1   | TMPO     |
| TUBB                                                                             | TYMS      | UBE2T | UEVLD | WDR4     |        |        |        |          |

| <b>Larsson et al</b>                                                             |           |         |         |         |        |        |         |        |
|----------------------------------------------------------------------------------|-----------|---------|---------|---------|--------|--------|---------|--------|
| Query List: Translationally down-regulated mRNAs in metformin treated MCF7 cells |           |         |         |         |        |        |         |        |
| Target List: HCMV induced translationally upregulated genes                      |           |         |         |         |        |        |         |        |
| p= 0.00000008                                                                    |           |         |         |         |        |        |         |        |
| Overlapping Genes:                                                               |           |         |         |         |        |        |         |        |
| AP1S1                                                                            | CUL2      | GPATCH2 | MRPS31  | PRKAB1  | RIF1   | SPG20  | CRBN    | COPS3  |
| ARMC6                                                                            | DIAPH2    | HAT1    | NAA15   | PSMA3   | RIPK1  | SRPRB  | GLRX3   | GEMIN6 |
| ATL3                                                                             | DNAJA1    | HHEX    | NFKBIZ  | PSMD3   | RNF25  | TIMM44 | MRPL27  | MED6   |
| C12orf44                                                                         | EXOSC4    | HSD11B2 | ORC5    | PSPC1   | RPAP3  | TIMM50 | PRAME   | PNN    |
| C12orf60                                                                         | EXOSC6    | HSPA4   | OSBPL11 | RAD51L1 | S100A4 | TRMU   | RBM45   | RBM39  |
| CCDC58                                                                           | G3BP2     | ICT1    | PCYT1A  | RBBP4   | SEN8   | WSB1   | SNRNP40 | SMC3   |
| CDKAL1                                                                           | GADD45GIF | MED21   | PFDN6   | RBM25   | SFPQ   | YBX1   | ZNF654  |        |

| <b>Hsieh et al</b>                                                          |        |        |       |       |      |      |       |         |
|-----------------------------------------------------------------------------|--------|--------|-------|-------|------|------|-------|---------|
| Query List: Translationally down-regulated mRNAs in pp242 treated PC3 cells |        |        |       |       |      |      |       |         |
| Target List: HCMV/UL38 induced translationally upregulated genes            |        |        |       |       |      |      |       |         |
| p= 0.000386                                                                 |        |        |       |       |      |      |       |         |
| Overlapping Genes:                                                          |        |        |       |       |      |      |       |         |
| EEF2                                                                        | ALKBH7 | EEF1A1 | PGLS  | RPL36 | RPS2 | RPS9 | RPS23 | SIGMAR1 |
| AHCY                                                                        | ATP5G2 | EIF2S3 | RPL34 | RPLP1 |      |      |       |         |

| <b>Bilanges et al</b>                                                |      |      |      |       |         |        |      |        |
|----------------------------------------------------------------------|------|------|------|-------|---------|--------|------|--------|
| Query List: Translationally up-regulated mRNAs in TSC2 knockout MEFs |      |      |      |       |         |        |      |        |
| Target List: HCMV induced translationally upregulated genes          |      |      |      |       |         |        |      |        |
| p= 0.000963                                                          |      |      |      |       |         |        |      |        |
| Overlapping Genes:                                                   |      |      |      |       |         |        |      |        |
| ACBD6                                                                | BTF3 | CCT2 | FXR1 | HSPA8 | KDELRL1 | NUDT21 | PPIB | RPL35A |
| ATP5A1                                                               | SSR4 |      |      |       |         |        |      |        |

## SUPPLEMENTAL EXPERIMENTAL PROCEDURES

### **Antibodies and quantitative immunoblotting**

Antibodies were acquired from the following vendors/individuals: PABP1 (S. Morley, Univ. Sussex, UK), Akt (Cell Signaling #9272), Actin (Calbiochem #CP01), pp28 (Abcam # ab6502), UL44 (Virusys # CA006), IE1/2 (Millipore #MAB810), UL38 (gift from T. Shenk-Princeton Univ.), PP1 $\alpha$  (Cell Signaling #2582), STAT3 (Cell Signaling #4904), eEF2 (Cell Signaling #2332), Gsk3 $\beta$  (Cell Signaling #5676), eIF4H (Cell Signaling #2444), anti- Vaccinia Virus (Virostat #8101), ICP0 (Goodwin Inst. #1114), VP16 (gift from A. Wilson, NYU), Us11 (gift from Rich Roller, Univ. Iowa). For quantitative immunoblotting, a secondary antibody covalently linked to an infrared fluorophore was used (#'s 827-08364, 926-68171 Li-Cor Biosciences) and the membrane was scanned using an Odyssey infrared imager (Li-Cor Biosciences).

### **Cells, Viruses and Chemicals**

Normal Human Diploid Fibroblasts (NHDFs; purchased from Clonetics) were routinely sub-cultured by a 1:3 split and maintained until passage 20 in complete media (DMEM supplemented with 5% FBS, 1% L-glutamine, and 1% Penicillin/Streptomycin [v/v]). GFP-expressing HCMV (AD169 strain) Wild-type (WT) virus was propagated as described (Terhune et al., 2007). Doxycycline-inducible, UL38-expressing NHDFs were generated as described (McKinney et al., 2013). To produce lentiviruses, 293 FT cells were transfected at 70%

confluency with equimolar amounts of the pSLIK hygro-UL38 recombinated plasmid produced above,  $\Delta$ 8.9 packaging vector, and pMO2G VSV-G envelope protein containing vector. Supernatants were collected 48 and 72 hrs post transfection and used to infect early passage NHDFs twice for 18 hours each. A Tet-inducible UL38-expressing population of transduced cells was then selected using 50  $\mu$ g/ml hygromycin B (*Life Technologies*).

### **Preparation of cell-free extracts for polysome isolation**

NHDFs ( $1 \times 10^7$  mock or HCMV-infected (MOI=3); or stably-transduced with a dox-inducible (-/+ 1  $\mu$ g/ml dox) UL38-expression vector (*McKinney et al., 2013*) were cycloheximide (CHX)-treated (100  $\mu$ g/ml) for 10 min. in complete media, washed with PBS, trypsinized to detach the cells, and resuspended in an equal volume buffer 1 [PBS + 1x EDTA-protease inhibitor (Roche)+ CHX]. Cells were pelleted at 1250 RPM for 4 min. and the resulting pellet rinsed with buffer 1, resuspended in 750  $\mu$ l of polysome isolation buffer (200mM Tris-HCl, pH 7.5, 100 mM NaCl, 30 mM MgCl<sub>2</sub>, 100  $\mu$ g/ml CHX) and cooled on ice for 5 min. Detergent lysis buffer [1.2% triton X-100, 0.2M sucrose in polysome isolation buffer) was added (250  $\mu$ l) to the suspended cells and the mixture homogenized gently with 10 strokes using a dounce. Lysates were clarified by centrifugation (10,000 x g) for 10 min. at 4°C. Supernatants were transferred to a fresh tube containing 100  $\mu$ l of heparin sulfate (10 mg/ml; *Sigma*) in polysome isolation buffer + CHX (100  $\mu$ g/ml).



### **Gradient fractionation and polysome isolation**

Cell free lysates supplemented with heparin sulfate prepared as described in the preceding section were layered onto 11 ml 15-50% linear sucrose gradients (in polysome isolation buffer supplemented with 100  $\mu\text{g/ml}$  CHX), sedimented at 36,000 RPM for 1.5 hours, at 4° in an SW40 rotor and allowed to stop without use of the brake. Gradients were fractionated using an ISCO fraction collector by pushing >50% sucrose from the bottom and collecting 750  $\mu\text{l}$  fractions from the top while monitoring the RNA absorbance at 254 nm. EDTA was added to 20 mM and RNA extracted with 1 volume of acid phenol- $\text{CHCl}_3$  followed by  $\text{CHCl}_3$ -extraction and precipitated overnight with 1 volume of isopropanol and 0.1 volume of sodium acetate. RNA was pelleted at 13000 x g for 10 min at 4°C, rinsed with 75% ethanol, and resuspended in 100  $\mu\text{l}$  of nuclease-free  $\text{H}_2\text{O}$ . Fractions 5-12, representing polysome fractions were pooled, phenol- $\text{CHCl}_3$  extracted, precipitated with isopropanol, washed with ethanol as described and resuspended in 30  $\mu\text{l}$  nuclease-free  $\text{H}_2\text{O}$ .

### **Microarray analysis**

DNA array analysis was performed at the NYU Genome Technology Center. Samples were processed in duplicate for each experimental condition. RNA quantity and quality was analyzed using Agilent 2100 Bioanalyzer and Nanodrop-2000. Preparation of biotinylated cRNA probes using 100 ng of pooled polysome RNA and hybridization to GeneChip HGU133A 2.0 arrays followed the recommendations of the manufacturer (Affymetrix). Raw data were normalized

by Robust Multichip Average (RMA) involving a background adjustment, quantile normalization and summarization performed by the GeneSpring (*Agilent*) software version GX11 (*Irizarry et al., 2003*). Differentially abundant mRNAs were identified by t-test with the p-value cut-off of 0.05 at alpha level. Individual differential abundance data obtained from independent, duplicate samples were extensively validated by qPCR and immunoblotting in lieu of applying corrections for multiple testing due to the investigative, rather than corroborative nature of the microarray experiment. We used the Pavlidis Template Matching algorithm available in the open source TM4 analytical suite and fold-change thresholding to define specific types of profiles of mRNA abundance across experimental conditions (*Saeed et al., 2003*). The complete set of microarray data was deposited for public access to the NCBI Gene Expression Omnibus database.

### **RNA interference, Viral Replication Assay, and Microscopy**

The eIF6 siRNA smartpool was purchased from *Dharmacon (M-010096-01-0005)*. PP1 $\alpha$  siRNA # 5 and 6 were purchased from *Qiagen (SI02225748 and SI02225755, respectfully)*. AllStars Negative Control siRNA, a synthetic 21-nucleotide complementary RNA with 2 nucleotide overhangs was used as a nonsilencing control (*Qiagen 102728*). NHDFs were grown to 70-80% confluence on a 12 well plate and transfected with 20 nM of siRNA + 2 $\mu$ l of RNAi Max according to the manufacturer's instructions (*Life Technologies*). 48 hours after transfection, cells were infected with AD169 WT HCMV-GFP (MOI= 0.1) for 4 days. EGFP-expression was used to measure HCMV spread and visualized

under 5x magnification using a Zeiss Axiovert 200 fluorescent microscope. To quantify viral replication, supernatants were collected and viral progeny quantified by TCID<sub>50</sub> as previously described (*Kudchodkar et al., 2004*).

### **RNA Isolation and qPCR**

RNA was extracted from cell free lysates using Trizol according the manufacturer's instructions. 250 ng of RNA was reverse transcribed using qScript cDNA Supermix (*Quanta Biosciences -#95048*) according to manufacturer instructions. PCR amplifications were performed using a BIO-RAD iQ iCycler. The following primer sets were used for qPCR analysis: 18s (fw: AGGAATTGAC GGAAGGGCACCA and rev: TTATCGGAATTAACCAGACAAATCG); STAT3, eIF6, Ago3 (eIF2S3), eIF4H, GSK3 $\beta$ , PP1 $\alpha$  and eEF2 were purchased commercially (*Origene*). mRNA induction was approximated using the  $-\Delta\Delta\text{CT}$  relative quantification method (*Perez et al., 2011*).

### **Comparison of polysome profile signatures with other genome-wide studies on translationally-controlled genes**

Comparisons between lists of genes with polysome signatures (*target list*) and lists of translationally-controlled genes from previously published studies (*query list*), were evaluated with the Chi-squared test, assuming as an expected value (*null hypothesis*) an equivalent number of genes randomly drawn from the genome.

$Chi(x) = (observed - expected)^2 / expected.$

expected = (# genes in target list / # genes in genome) x genes in query list.

observed = actual number of matches between lookup list and target list.

### **RNA signature analysis**

5'-UTR sequences for each human gene were extracted from the UCSC refGene table using standard HUGO gene names. If multiple RefSeq transcripts exist for a single gene, all unique 5'-UTR sequences were used and indexed by RefSeq transcript ID. 5'-UTR length is the count of bases from the transcription start site (TSS) to the start codon of the protein-coding region. G+C content of each 5' sequence was calculated with the EMBOSS geecee program. Gibbs free energy of folding was calculated with the Quickfold method of the DINAMelt Web Server (m-fold; *Zuker & Markham, 2013*) with the RNA 3.0 default settings. Statistical significance of differences between G+C content, 5'-UTR length, and free energy were computed with students t-test. To discover motifs in the 5'-UTR, the EMBOSS fuzznuc program (*Rice et al., 2000*) was used with the following regular expressions. For the TOP motif (*Meyuhas, 2000*): <C[TC][TC][TC][TC] (5' UTR must start with C at TSS, followed by 4 T/C). For the PRTE motif (*Hsieh et al., 2012*): [TC][TC][TC][TC][TC]T[TC][TC][TC] (5 T/C, one required T, 3 more T/C located anywhere in 5' UTR).

## SUPPLEMENTAL REFERENCES

Hsieh, A.C., Liu, Y., Edlind, M.P., Ingolia, N.T., Janes, M.R., Sher, A., Shi, E.Y., Stumpf, C.R., Christensen, C., Bonham, M.J. et al. (2012). The translational landscape of mTOR signaling steers cancer initiation and metastasis. *Nature* **485**, 55-61.

Kobayashi, M., Wilson, A.C., Chao, M.V., and Mohr, I. (2012). Control of viral latency in neurons by axonal mTOR signaling and the 4E-BP translation repressor. *Genes Dev.* **14**, 1527-1532.

Kudchodkar, S.B., Yu, Y., Maguire, T.G., and Alwine, J.C. (2004). Human cytomegalovirus infection induces rapamycin-insensitive phosphorylation of downstream effectors of mTOR kinase. *J. Virol.* **78**, 11030-11039.

McKinney, C., Yu, D., and Mohr I. (2013). A new role for the cellular PABP repressor Paip2 as an innate restriction factor capable of limiting productive cytomegalovirus replication. *Genes Dev.* **27**, 1809-1820.

Meyuhas, O. (2000). Synthesis of the translational apparatus is regulated at the translational level. *Eur. J. Biochem.* **267**, 6321-6330.

Moorman, N.J., Cristea, I.M., Terhune, S.S., Rout, M.P., Chait, B.T., and Shenk, T. (2008). Human cytomegalovirus protein UL38 inhibits host cell stress responses by antagonizing the tuberous sclerosis protein complex. *Cell Host Microbe* **3**, 253-262.

Perez, C., McKinney, C., Chuluunbaatar, U., and Mohr, I. (2011). Translational control of cytoplasmic poly A binding protein (PABP) abundance in HCMV-infected cells. *J. Virol.* **85**, 156 -164.

Rice, P., Longden, I., and Bleasby, A. (2000). EMBOSS: the European Molecular Biology Open Software Suite. *Trends Genetics* **16**, 276-277.

Saeed, A.I., Sharov, V., White, J., Li, J., Liang, W., Bhagabati, N., Braisted, J., Klapa, M., Currier, T., Thiagarajan, M. et al., (2003). TM4: a free, open-source system for microarray data management and analysis. *Biotechniques.* **34**, 374-378.

Terhune, S., Torigoi, E., Moorman, N., Silva, M., Qian, Z., Shenk, T., and Yu, D. (2007). Human cytomegalovirus UL38 protein blocks apoptosis. *J. Virol.* **81**, 3109-3123.

Zuker, M., and Markham, N. m-fold web server: © Rensselaer Polytechnic Institute, hosted by The RNA Institute, College of Arts and Sciences, State

University of New York at Albany. 1995-2013.  
<http://mfold.rutgers.edu/?q=DINAMelt/Quickfold>
